# Supplementary material
Source: PubMed Central journal article supplement (PMC7705607)
Supplement: NIHMS1624666-supplement-Appendix.pdf [file NIHMS1624666-supplement-Appendix.pdf]

## **Supplemental Appendix**

**Prioritizing additional data collection to reduce decision uncertainty in the HIV/AIDS response in 6 US cities: a value of information analysis**

This supplementary appendix provides supporting information to the manuscript and presents the process of the expected value of partially perfect information (EVPPI) result validation and model tuning for the artificial neural network (ANN) model, organized as follows:

- Figure A1 presents the schematic diagram for the structure of the dynamic compartmental HIV transmission model we applied in this value of information analysis. It shows the 19 health states that individuals progress through in the model.
- Figure A2 presents the flowchart depicting the process of the EVPPI analysis.
- Figure A3 shows the result validation comparing the EVPPI estimates for the parameter group of HIV transmission probabilities per homosexual partnership using the ANN model and the generalized additive model (GAM) model.
- Figure A4 shows the probabilities of computing combination strategies representing the highest values, by cost-effectiveness threshold.
- Figure A5 shows the composition of the highest-valued combination strategies, by cost-effectiveness threshold.
- Figure A6 shows the city-level expected value of perfect information, by cost-effectiveness threshold.
- Figure A7 shows the estimated EVPPI for each individual model parameter using GAM at a threshold of \$100,000/QALY, ranked by EVPPI. We then identified and grouped those with the greatest EVPPI as key groups of model parameters for further metamodel analysis with the ANN model.
- Table A1 presents the description, values and uncertainty distributions for the key groups of model parameters that were found to be the most influential on decision uncertainty for each city.

## **Result validation and model tuning**

Given the novelty of the ANN metamodel, we performed several checks to ensure the validity of EVPPI estimates from this model for the key groups of parameters. First, given the extensive evidence for the precision and validation of the GAM approach, we treated the EVPPI estimates from GAM as the “gold standard” and compared the estimated EVPPI for HIV transmission probabilities per homosexual partnership (three parameters in the group) based on both the ANN and GAM approach (Figure A3). Second, following best practices, we defined the lower bound of the EVPPI for a given parameter group as the maximum EVPPI value estimated for each single parameter (using GAM) within that group, while the upper bound was defined as the city-level EVPI which measured the decision uncertainty from all model parameters jointly. We compared the ANN metamodel results to ensure the EVPPI estimates for all the identified key groups of parameters fell within the two bounds. Third, the variance of model predictions and resulted EVPPI from the ten repeated estimations can indicate good model fit, i.e. large variance indicates poor fit. We hand tuned the model by varying the number of hidden layers and hidden nodes until the estimated variance was within a reasonable range while the mean  $\pm 1.96$  x standard deviation of the estimated values was inside the two bounds. Figure A3 shows the result validation for the parameter group of HIV transmission probabilities per homosexual partnership.

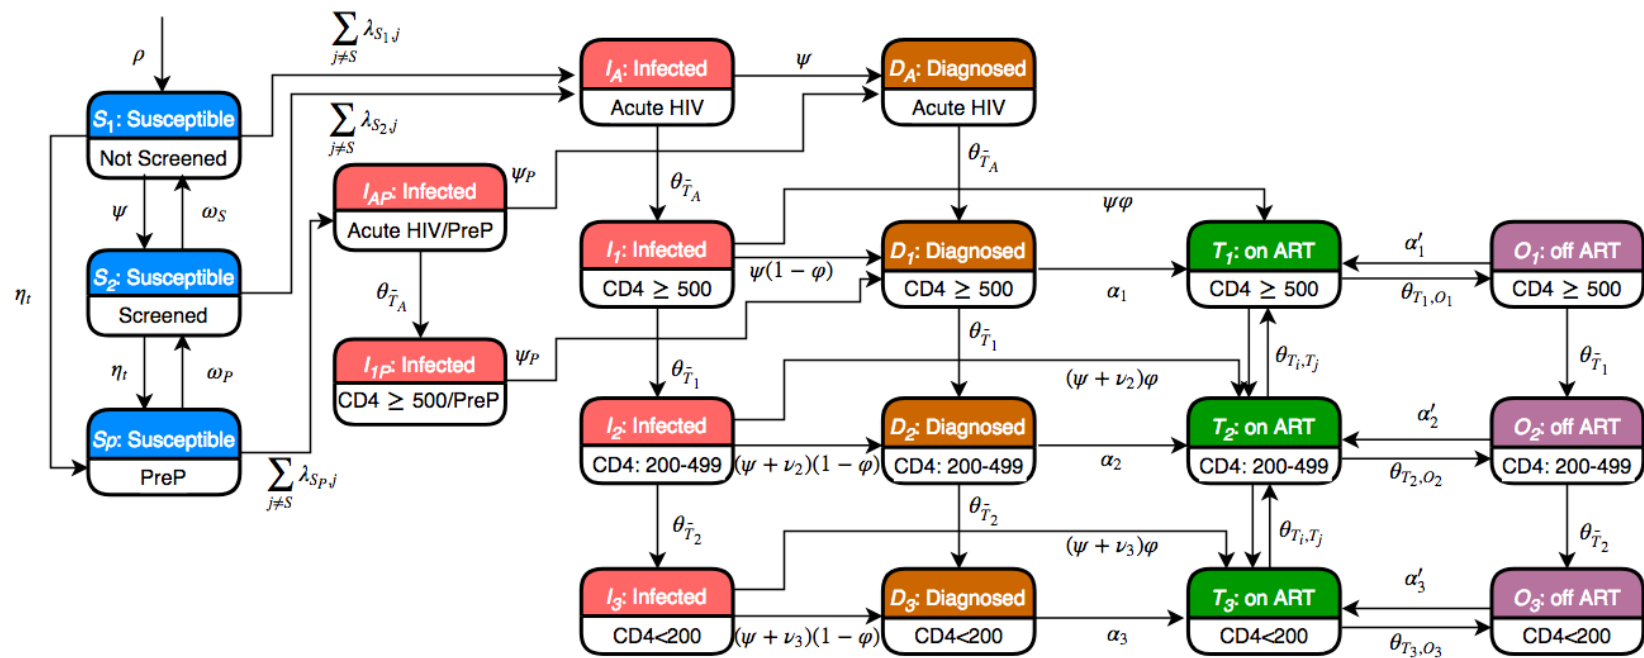

Figure A1. Model schematic diagram

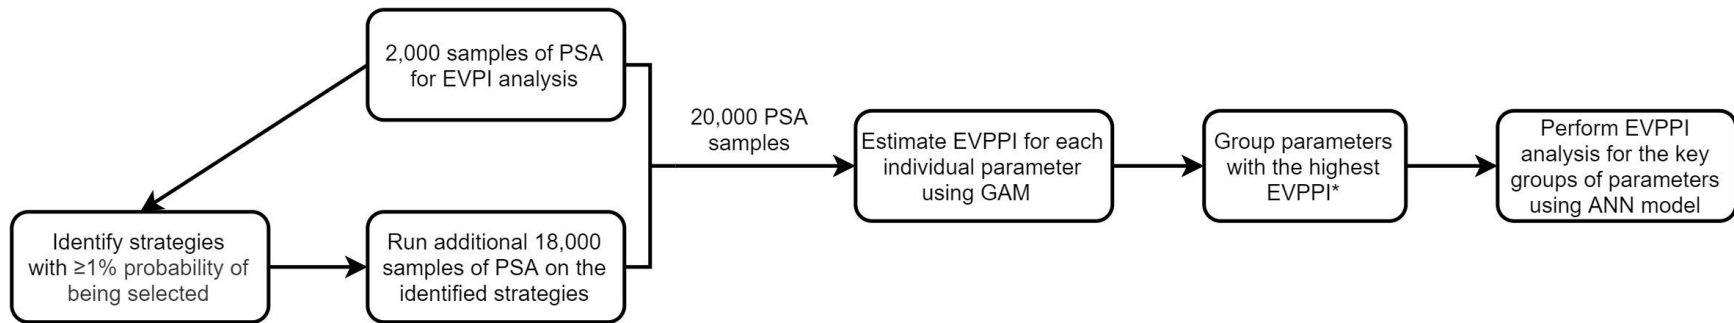

**Figure A2. Flowchart depicting the process of the expected value of partial perfect information analysis.**

PSA: probabilistic sensitivity analysis; EVPI: expected value of perfect information; EVPPI: expected value of partial perfect information; GAM: generalized additive model; ANN: artificial neural network. \* Key groups of parameters were defined by having at least one parameter whose  $EVPPI > (0.05 \times EVPI)$  and groupings were based on as per suggested in practice.

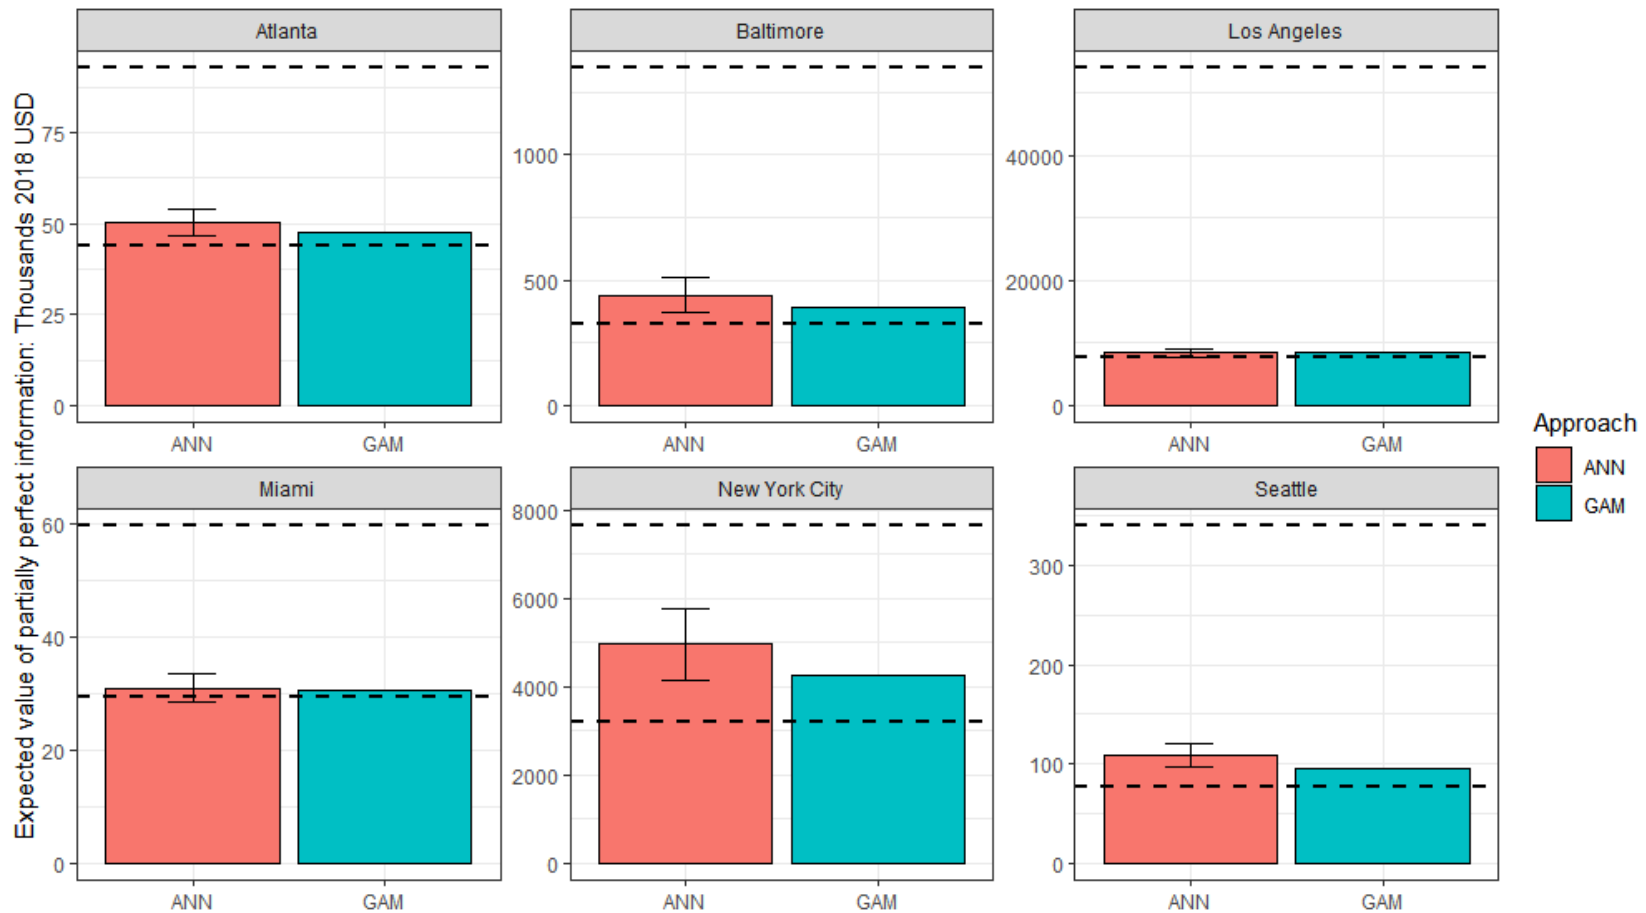

**Figure A3. Result validation for the parameter group of HIV transmission probabilities per homosexual partnership**

The error bars represent the mean  $\pm 1.96$  x standard deviation of the estimated values from the ten repeated estimations; two dashed lines represent the corresponding lower and upper bounds. ANN: artificial neural network; GAM: generalized additive model

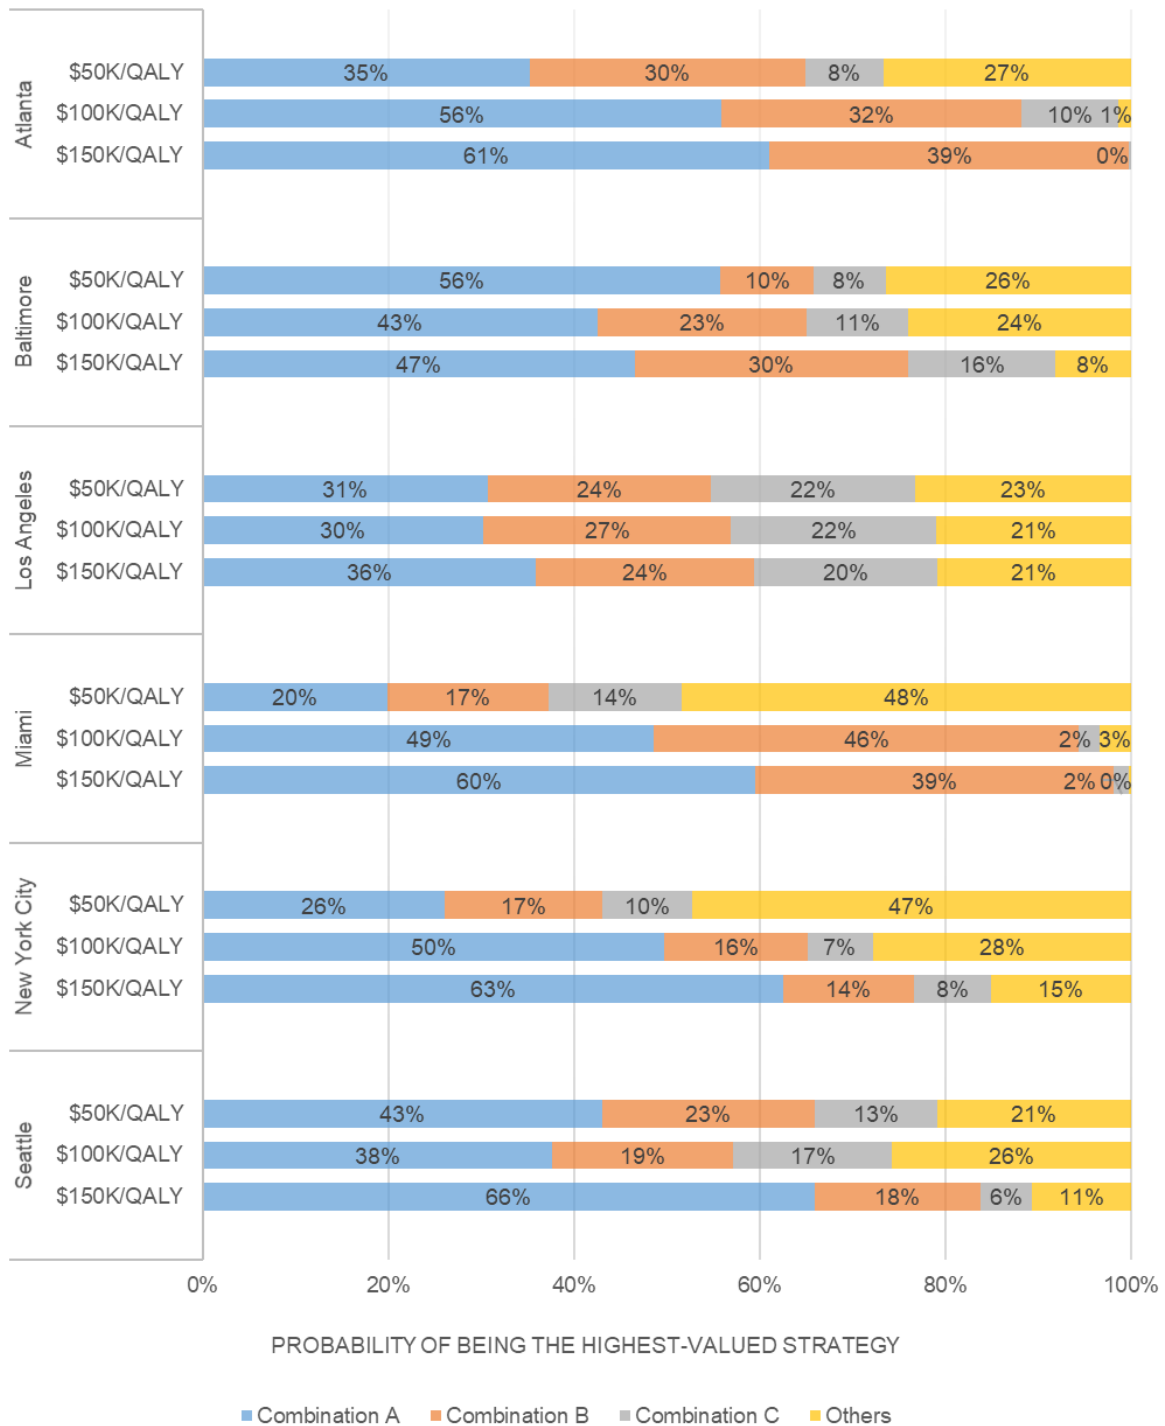

**Figure A4. Probabilities of computing combination strategies representing the highest values, by cost-effectiveness threshold.**

QALY: quality-adjusted life year

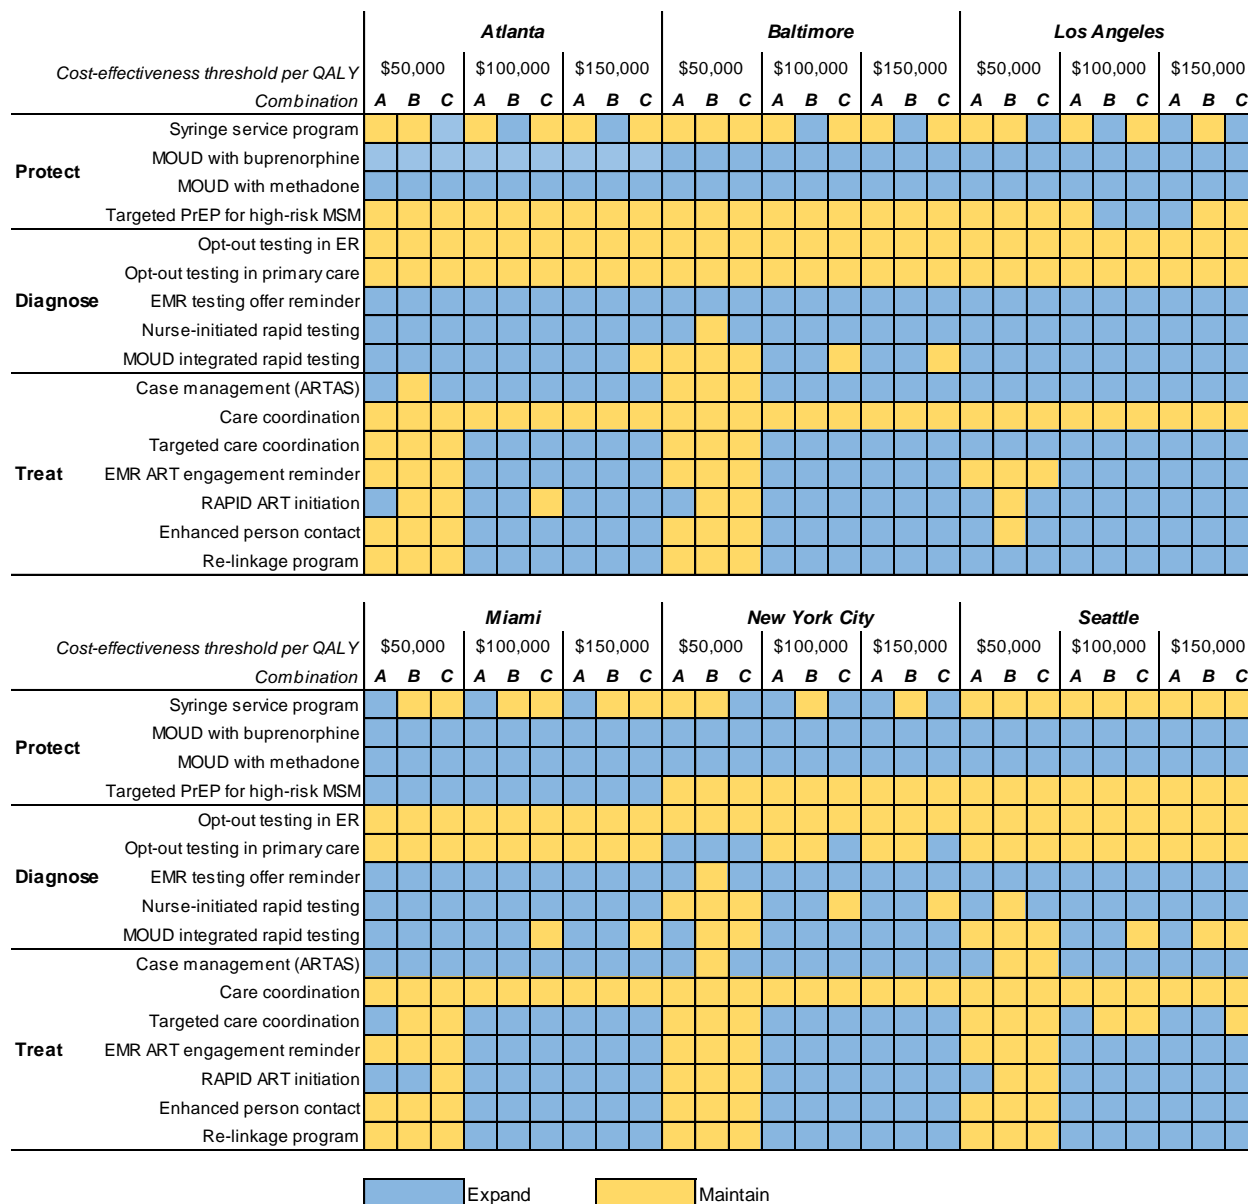

**Figure A5. The composition of the highest-valued combination strategies, by cost-effectiveness threshold.**

MOUD: Medication for opioid use disorder; PrEP: Pre-exposure prophylaxis; MSM: Men who have sex with men; ER: Hospital emergency room; EMR: Electronic medical records; ART: antiretroviral therapy.



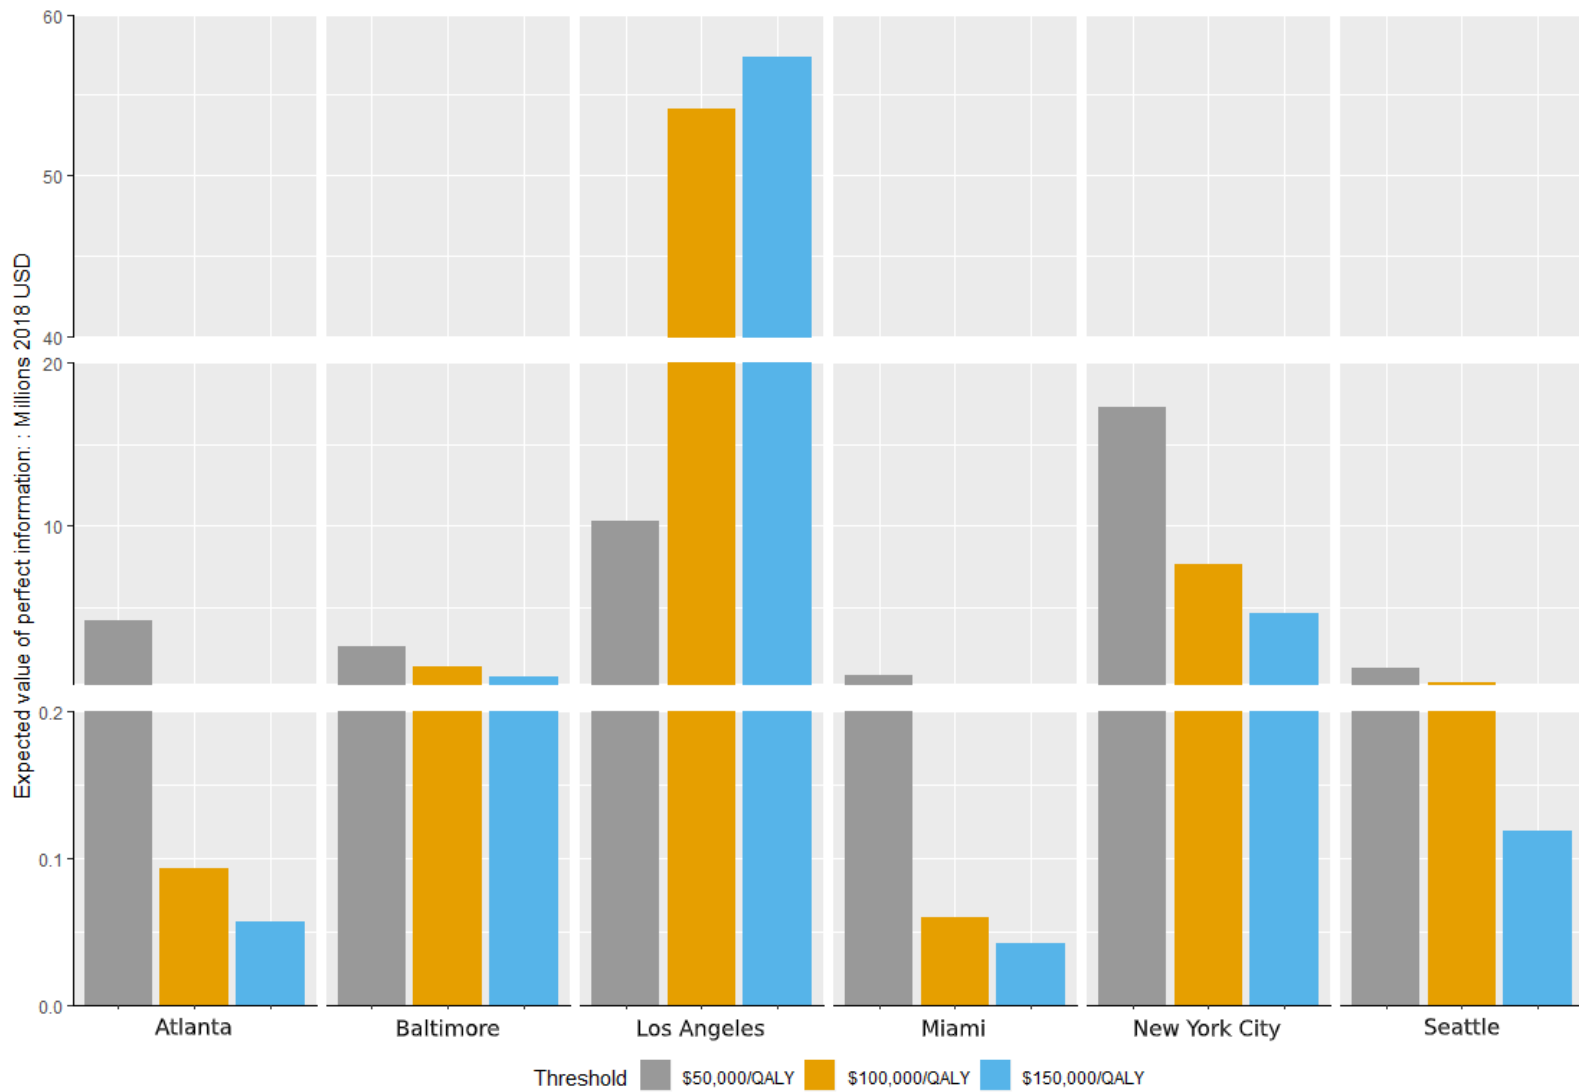

**Figure A6. The city-level expected value of perfect information, by cost-effectiveness threshold.**

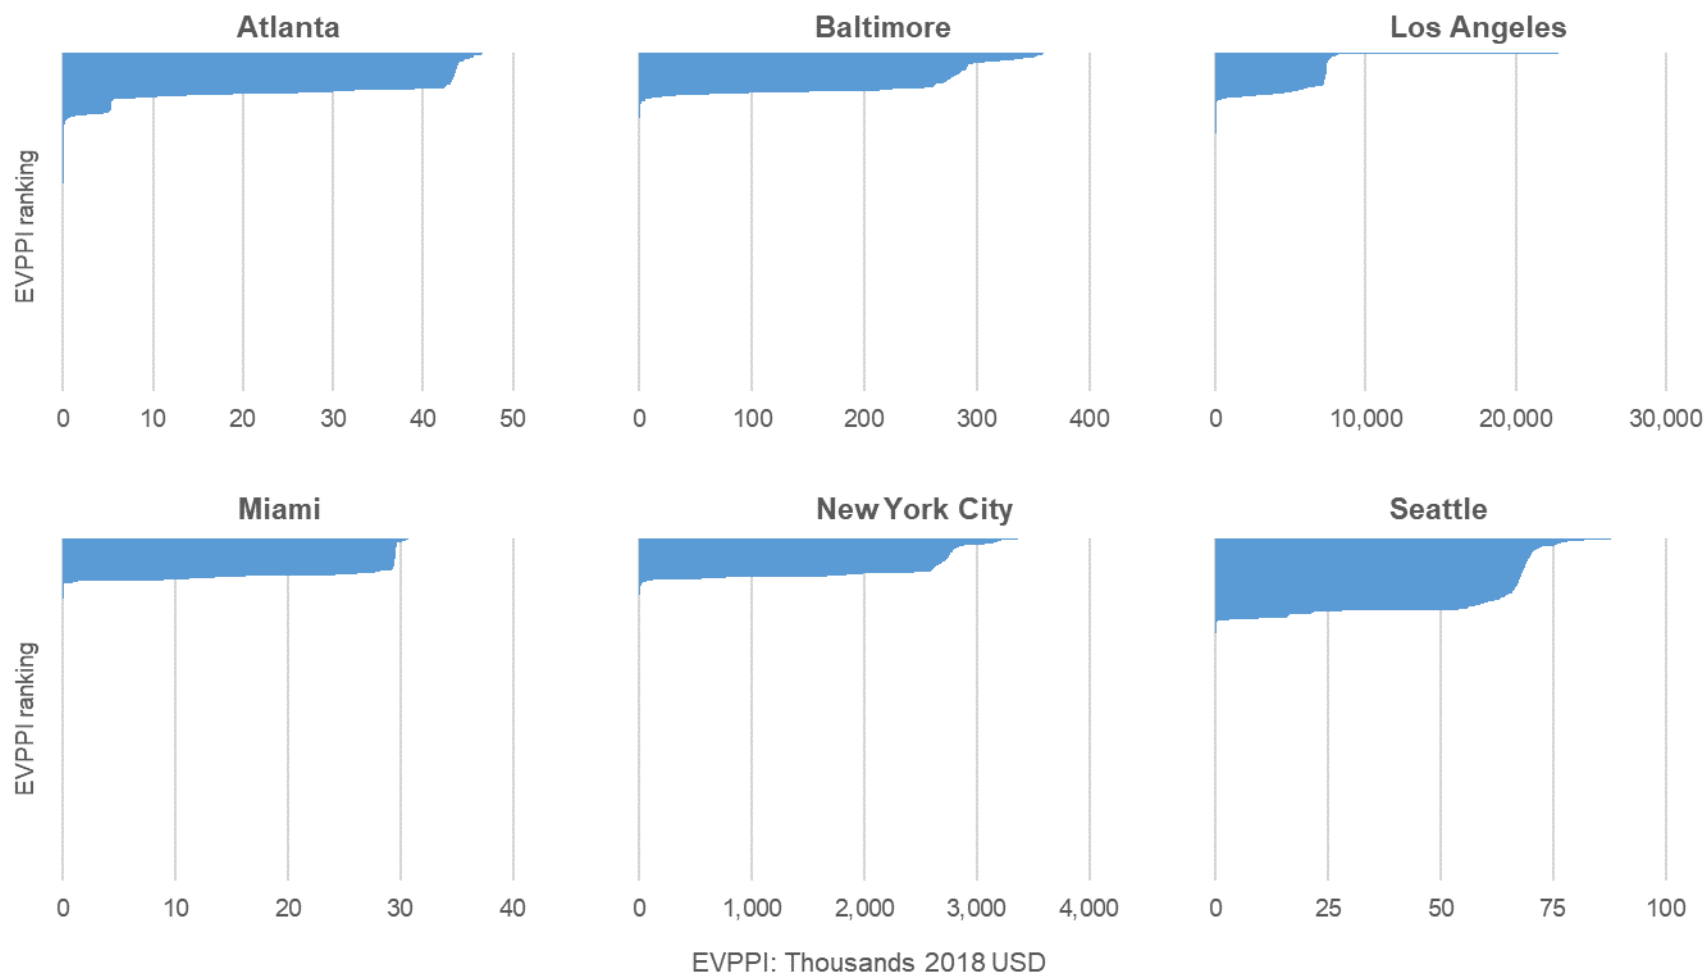

**Figure A7. Distribution of the expected value of partial perfect information (EVPPI) for each individual model parameter.**

**Table A1. The key groups of model parameters most influential on decision uncertainty for each city**

| CITY                                                                    | Atlanta           | Baltimore         | Los Angeles       | Miami             | New York City     | Seattle           |
|-------------------------------------------------------------------------|-------------------|-------------------|-------------------|-------------------|-------------------|-------------------|
| <b>MORTALITY RATES FOR PLHIV</b>                                        |                   |                   |                   |                   |                   |                   |
| Monthly mortality rate for PLHIV (CD4: 200-499), except PWID            |                   |                   |                   |                   |                   |                   |
| PE                                                                      | 6.39E-04          | 6.39E-04          | 6.39E-04          | 6.39E-04          | 6.39E-04          | 6.39E-04          |
| Distribution                                                            | Pert(1.13, 4.02)  | Pert(1.13, 4.02)  | Pert (1.13, 4.02) | Pert (1.13, 4.02) | Pert (1.13, 4.02) | Pert (1.13, 4.02) |
| Monthly mortality rate for PLHIV (CD4<200), except PWID                 |                   |                   |                   |                   |                   |                   |
| PE                                                                      | 0.0072            | 0.0072            | 0.0072            | 0.0072            | 0.0072            | 0.0072            |
| Distribution                                                            | Pert (3.21, 4.53) |
| Multiplier of mortality rate for PLHIV that inject drugs (CD4: 200-499) |                   |                   |                   |                   |                   |                   |
| PE                                                                      | 1.59              | 1.59              | 1.59              | 1.59              | 1.59              | 1.59              |
| Distribution                                                            | Pert (1.16, 4.06) |
| Multiplier of mortality rate for PLHIV that inject drugs (CD4<200)      |                   |                   |                   |                   |                   |                   |
| PE                                                                      | 1.59              | 1.59              | 1.59              | 1.59              | 1.59              | 1.59              |
| Distribution                                                            | Pert (1.16, 4.06) |
| Monthly mortality rate for PLHIV on ART (CD4>500), Male White PWID      |                   |                   |                   |                   |                   |                   |
| PE                                                                      | 0.000868          | 0.000798          | 0.000786          | 0.000868          | 0.000798          | 0.000748          |
| Distribution                                                            | ln (-7.13, 0.246) | ln (-7.13, 0.246) | ln (-7.15, 0.288) | ln (-7.13, 0.246) | ln (-7.13, 0.246) | ln (-7.20, 0.316) |
| Monthly mortality rate for PLHIV on ART (CD4>500), Male White MSM       |                   |                   |                   |                   |                   |                   |
| PE                                                                      | 0.000303          | 0.000277          | 0.000273          | 0.000303          | 0.000277          | 0.000259          |
| Distribution                                                            | ln (-8.10, 0.184) | ln (-8.19, 0.167) | ln (-8.21, 0.196) | ln (-8.10, 0.184) | ln (-8.19, 0.167) | ln (-8.26, 0.236) |
| Monthly mortality rate for PLHIV on ART (CD4>500), Male White MWID      |                   |                   |                   |                   |                   |                   |
| PE                                                                      | 0.000693          | 0.000636          | 0.000625          | 0.000693          | 0.000636          | 0.000617          |
| Distribution                                                            | ln (-7.27, 0.237) | ln (-7.36, 0.221) | ln (-7.38, 0.241) | ln (-7.27, 0.237) | ln (-7.36, 0.221) | ln (-7.39, 0.29)  |
| Monthly mortality rate for PLHIV on ART (CD4>500), Male White HET       |                   |                   |                   |                   |                   |                   |
| PE                                                                      | 0.000380          | 0.000348          | 0.000343          | 0.000380          | 0.000348          | 0.000314          |
| Distribution                                                            | ln (-7.88, 0.234) | ln (-7.96, 0.236) | ln (-7.98, 0.279) | ln (-7.88, 0.234) | ln (-7.96, 0.236) | ln (-8.07, 0.304) |
| Monthly mortality rate for PLHIV on ART (CD4>500), Male Black PWID      |                   |                   |                   |                   |                   |                   |
| PE                                                                      | 0.000759          | 0.000699          | 0.000688          | 0.000759          | 0.000699          | 0.000630          |
| Distribution                                                            | ln (-7.18, 0.204) | ln (-7.27, 0.204) | ln (-7.28, 0.27)  | ln (-7.18, 0.204) | ln (-7.27, 0.204) | ln (-7.37, 0.3)   |
| Monthly mortality rate for PLHIV on ART (CD4>500), Male Black MSM       |                   |                   |                   |                   |                   |                   |
| PE                                                                      | 0.000265          | 0.000242          | 0.000239          | 0.000265          | 0.000242          | 0.000218          |
| Distribution                                                            | ln (-8.24, 0.198) | ln (-8.32, 0.193) | ln (-8.34, 0.244) | ln (-8.24, 0.198) | ln (-8.32, 0.193) | ln (-8.43, 0.287) |
| Monthly mortality rate for PLHIV on ART (CD4>500), Male Black MWID      |                   |                   |                   |                   |                   |                   |
| PE                                                                      | 0.000606          | 0.000556          | 0.000548          | 0.000606          | 0.000556          | 0.000519          |
| Distribution                                                            | ln (-7.41, 0.248) | ln (-7.49, 0.243) | ln (-7.51, 0.277) | ln (-7.41, 0.248) | ln (-7.49, 0.243) | ln (-7.56, 0.338) |
| Monthly mortality rate for PLHIV on ART (CD4>500), Male Black HET       |                   |                   |                   |                   |                   |                   |
| PE                                                                      | 0.000332          | 0.000305          | 0.000301          | 0.000332          | 0.000305          | 0.000264          |
| Distribution                                                            | ln (-8.01, 0.207) | ln (-8.10, 0.204) | ln (-8.11, 0.257) | ln (-8.01, 0.207) | ln (-8.10, 0.204) | ln (-8.24, 0.303) |
| Monthly mortality rate for PLHIV on ART (CD4>500), Male Hispanic PWID   |                   |                   |                   |                   |                   |                   |
| PE                                                                      | 0.000439          | 0.000403          | 0.000398          | 0.000439          | 0.000403          | 0.000376          |
| Distribution                                                            | ln (-7.73, 0.272) | ln (-7.82, 0.274) | ln (-7.83, 0.292) | ln (-7.73, 0.272) | ln (-7.82, 0.274) | ln (-7.89, 0.351) |
| Monthly mortality rate for PLHIV on ART (CD4>500), Male Hispanic MSM    |                   |                   |                   |                   |                   |                   |
| PE                                                                      | 0.000153          | 0.000140          | 0.000138          | 0.000153          | 0.000140          | 0.000130          |

|                                                                         |                   |                   |                   |                   |                   |                   |
|-------------------------------------------------------------------------|-------------------|-------------------|-------------------|-------------------|-------------------|-------------------|
| <i>Distribution</i>                                                     | ln (-8.78, 0.265) | ln (-8.87, 0.228) | ln (-8.89, 0.292) | ln (-8.78, 0.265) | ln (-8.87, 0.228) | ln (-8.95, 0.307) |
| Monthly mortality rate for PLHIV on ART (CD4>500), Male Hispanic MWID   |                   |                   |                   |                   |                   |                   |
| <i>PE</i>                                                               | 0.000351          | 0.000321          | 0.000316          | 0.000351          | 0.000321          | 0.000310          |
| <i>Distribution</i>                                                     | ln (-7.96, 0.315) | ln (-8.04, 0.294) | ln (-8.06, 0.34)  | ln (-7.96, 0.315) | ln (-8.04, 0.294) | ln (-8.08, 0.372) |
| Monthly mortality rate for PLHIV on ART (CD4>500), Male Hispanic HET    |                   |                   |                   |                   |                   |                   |
| <i>PE</i>                                                               | 0.000192          | 0.000176          | 0.000174          | 0.000192          | 0.000176          | 0.000158          |
| <i>Distribution</i>                                                     | ln (-8.56, 0.295) | ln (-8.65, 0.266) | ln (-8.66, 0.327) | ln (-8.56, 0.295) | ln (-8.65, 0.266) | ln (-8.75, 0.333) |
| Monthly mortality rate for PLHIV on ART (CD4>500), Female White PWID    |                   |                   |                   |                   |                   |                   |
| <i>PE</i>                                                               | 0.000673          | 0.000616          | 0.000606          | 0.000673          | 0.000616          | 0.000597          |
| <i>Distribution</i>                                                     | ln (-7.30, 0.267) | ln (-7.39, 0.241) | ln (-7.41, 0.288) | ln (-7.30, 0.267) | ln (-7.39, 0.241) | ln (-7.42, 0.307) |
| Monthly mortality rate for PLHIV on ART (CD4>500), Female White HET     |                   |                   |                   |                   |                   |                   |
| <i>PE</i>                                                               | 0.000294          | 0.000269          | 0.000264          | 0.000294          | 0.000269          | 0.000250          |
| <i>Distribution</i>                                                     | ln (-8.13, 0.232) | ln (-8.22, 0.228) | ln (-8.24, 0.263) | ln (-8.13, 0.232) | ln (-8.22, 0.228) | ln (-8.29, 0.294) |
| Monthly mortality rate for PLHIV on ART (CD4>500), Female Black PWID    |                   |                   |                   |                   |                   |                   |
| <i>PE</i>                                                               | 0.000587          | 0.000539          | 0.000531          | 0.000587          | 0.000539          | 0.000502          |
| <i>Distribution</i>                                                     | ln (-7.44, 0.217) | ln (-7.53, 0.226) | ln (-7.54, 0.282) | ln (-7.44, 0.217) | ln (-7.53, 0.226) | ln (-7.6, 0.309)  |
| Monthly mortality rate for PLHIV on ART (CD4>500), Female Black HET     |                   |                   |                   |                   |                   |                   |
| <i>PE</i>                                                               | 0.000257          | 0.000235          | 0.000232          | 0.000257          | 0.000235          | 0.000211          |
| <i>Distribution</i>                                                     | ln (-8.27, 0.182) | ln (-8.36, 0.19)  | ln (-8.37, 0.265) | ln (-8.27, 0.182) | ln (-8.36, 0.19)  | ln (-8.46, 0.297) |
| Monthly mortality rate for PLHIV on ART (CD4>500), Female Hispanic PWID |                   |                   |                   |                   |                   |                   |
| <i>PE</i>                                                               | 0.000341          | 0.000311          | 0.000307          | 0.000341          | 0.000311          | 0.000300          |
| <i>Distribution</i>                                                     | ln (-7.98, 0.289) | ln (-8.07, 0.286) | ln (-8.09, 0.318) | ln (-7.98, 0.289) | ln (-8.07, 0.286) | ln (-8.11, 0.356) |
| Monthly mortality rate for PLHIV on ART (CD4>500), Female Hispanic HET  |                   |                   |                   |                   |                   |                   |
| <i>PE</i>                                                               | 0.000149          | 0.000136          | 0.000134          | 0.000149          | 0.000136          | 0.000126          |
| <i>Distribution</i>                                                     | ln (-8.81, 0.274) | ln (-8.90, 0.251) | ln (-8.92, 0.302) | ln (-8.81, 0.274) | ln (-8.90, 0.251) | ln (-8.98, 0.328) |
| Monthly mortality rate for PLHIV on ART (CD4: 200-499), Male White PWID |                   |                   |                   |                   |                   |                   |
| <i>PE</i>                                                               | 0.00132           | 0.00140           | 0.00165           | 0.00132           | 0.00140           | 0.00137           |
| <i>Distribution</i>                                                     | ln (-6.63, 0.191) | ln (-6.57, 0.186) | ln (-6.41, 0.204) | ln (-6.63, 0.191) | ln (-6.57, 0.186) | ln (-6.6, 0.223)  |
| Monthly mortality rate for PLHIV on ART (CD4: 200-499), Male White MSM  |                   |                   |                   |                   |                   |                   |
| <i>PE</i>                                                               | 0.000595          | 0.000628          | 0.000739          | 0.000595          | 0.000628          | 0.000613          |
| <i>Distribution</i>                                                     | ln (-7.43, 0.14)  | ln (-7.37, 0.151) | ln (-7.21, 0.145) | ln (-7.43, 0.14)  | ln (-7.37, 0.151) | ln (-7.4, 0.183)  |
| Monthly mortality rate for PLHIV on ART (CD4: 200-499), Male White MWID |                   |                   |                   |                   |                   |                   |
| <i>PE</i>                                                               | 0.000936          | 0.000985          | 0.001158          | 0.000936          | 0.000985          | 0.000951          |
| <i>Distribution</i>                                                     | ln (-6.97, 0.198) | ln (-6.92, 0.187) | ln (-6.76, 0.192) | ln (-6.97, 0.198) | ln (-6.92, 0.187) | ln (-6.96, 0.23)  |
| Monthly mortality rate for PLHIV on ART (CD4: 200-499), Male White HET  |                   |                   |                   |                   |                   |                   |
| <i>PE</i>                                                               | 0.000844          | 0.000896          | 0.001054          | 0.000844          | 0.000896          | 0.000882          |
| <i>Distribution</i>                                                     | ln (-7.08, 0.179) | ln (-7.02, 0.186) | ln (-6.85, 0.208) | ln (-7.08, 0.179) | ln (-7.02, 0.186) | ln (-7.03, 0.203) |
| Monthly mortality rate for PLHIV on ART (CD4: 200-499), Male Black PWID |                   |                   |                   |                   |                   |                   |
| <i>PE</i>                                                               | 0.00107           | 0.00113           | 0.00133           | 0.00107           | 0.00113           | 0.00104           |
| <i>Distribution</i>                                                     | ln (-6.84, 0.158) | ln (-6.78, 0.16)  | ln (-6.62, 0.192) | ln (-6.84, 0.158) | ln (-6.78, 0.16)  | ln (-6.86, 0.226) |
| Monthly mortality rate for PLHIV on ART (CD4: 200-499), Male Black MSM  |                   |                   |                   |                   |                   |                   |
| <i>PE</i>                                                               | 0.000481          | 0.000507          | 0.000597          | 0.000481          | 0.000507          | 0.000469          |
| <i>Distribution</i>                                                     | ln (-7.64, 0.155) | ln (-7.59, 0.163) | ln (-7.42, 0.172) | ln (-7.64, 0.155) | ln (-7.59, 0.163) | ln (-7.67, 0.21)  |
| Monthly mortality rate for PLHIV on ART (CD4: 200-499), Male Black MWID |                   |                   |                   |                   |                   |                   |

|                                                                              |                   |                   |                   |                   |                   |                   |
|------------------------------------------------------------------------------|-------------------|-------------------|-------------------|-------------------|-------------------|-------------------|
| <i>PE</i>                                                                    | 0.000758          | 0.000796          | 0.000936          | 0.000758          | 0.000796          | 0.000728          |
| <i>Distribution</i>                                                          | ln (-7.18, 0.206) | ln (-7.14, 0.193) | ln (-6.97, 0.223) | ln (-7.18, 0.206) | ln (-7.14, 0.193) | ln (-7.22, 0.266) |
| Monthly mortality rate for PLHIV on ART (CD4: 200-499), Male Black HET       |                   |                   |                   |                   |                   |                   |
| <i>PE</i>                                                                    | 0.000682          | 0.000723          | 0.000851          | 0.000682          | 0.000723          | 0.000674          |
| <i>Distribution</i>                                                          | ln (-7.29, 0.14)  | ln (-7.23, 0.158) | ln (-7.07, 0.196) | ln (-7.29, 0.14)  | ln (-7.23, 0.158) | ln (-7.3, 0.205)  |
| Monthly mortality rate for PLHIV on ART (CD4: 200-499), Male Hispanic PWID   |                   |                   |                   |                   |                   |                   |
| <i>PE</i>                                                                    | 0.000730          | 0.000768          | 0.000904          | 0.000730          | 0.000768          | 0.000733          |
| <i>Distribution</i>                                                          | ln (-7.22, 0.196) | ln (-7.17, 0.185) | ln (-7.01, 0.213) | ln (-7.22, 0.196) | ln (-7.17, 0.185) | ln (-7.22, 0.256) |
| Monthly mortality rate for PLHIV on ART (CD4: 200-499), Male Hispanic MSM    |                   |                   |                   |                   |                   |                   |
| <i>PE</i>                                                                    | 0.000328          | 0.000344          | 0.000405          | 0.000328          | 0.000344          | 0.000329          |
| <i>Distribution</i>                                                          | ln (-8.02, 0.195) | ln (-7.98, 0.177) | ln (-7.81, 0.191) | ln (-8.02, 0.195) | ln (-7.98, 0.177) | ln (-8.02, 0.226) |
| Monthly mortality rate for PLHIV on ART (CD4: 200-499), Male Hispanic MWID   |                   |                   |                   |                   |                   |                   |
| <i>PE</i>                                                                    | 0.000518          | 0.000540          | 0.000636          | 0.000518          | 0.000540          | 0.000512          |
| <i>Distribution</i>                                                          | ln (-7.57, 0.239) | ln (-7.52, 0.219) | ln (-7.36, 0.25)  | ln (-7.57, 0.239) | ln (-7.52, 0.219) | ln (-7.58, 0.261) |
| Monthly mortality rate for PLHIV on ART (CD4: 200-499), Male Hispanic HET    |                   |                   |                   |                   |                   |                   |
| <i>PE</i>                                                                    | 0.000464          | 0.000490          | 0.000577          | 0.000464          | 0.000490          | 0.000473          |
| <i>Distribution</i>                                                          | ln (-7.68, 0.188) | ln (-7.62, 0.179) | ln (-7.46, 0.196) | ln (-7.68, 0.188) | ln (-7.62, 0.179) | ln (-7.66, 0.229) |
| Monthly mortality rate for PLHIV on ART (CD4: 200-499), Female White PWID    |                   |                   |                   |                   |                   |                   |
| <i>PE</i>                                                                    | 0.00135           | 0.00142           | 0.00167           | 0.00135           | 0.00142           | 0.00140           |
| <i>Distribution</i>                                                          | ln (-6.61, 0.198) | ln (-6.56, 0.205) | ln (-6.39, 0.238) | ln (-6.61, 0.198) | ln (-6.56, 0.205) | ln (-6.57, 0.249) |
| Monthly mortality rate for PLHIV on ART (CD4: 200-499), Female White HET     |                   |                   |                   |                   |                   |                   |
| <i>PE</i>                                                                    | 0.000858          | 0.000908          | 0.001068          | 0.000858          | 0.000908          | 0.000903          |
| <i>Distribution</i>                                                          | ln (-7.06, 0.187) | ln (-7.00, 0.193) | ln (-6.84, 0.194) | ln (-7.06, 0.187) | ln (-7.00, 0.193) | ln (-7.01, 0.224) |
| Monthly mortality rate for PLHIV on ART (CD4: 200-499), Female Black PWID    |                   |                   |                   |                   |                   |                   |
| <i>PE</i>                                                                    | 0.00109           | 0.00115           | 0.00135           | 0.00109           | 0.00115           | 0.00107           |
| <i>Distribution</i>                                                          | ln (-6.82, 0.169) | ln (-6.77, 0.182) | ln (-6.61, 0.213) | ln (-6.82, 0.169) | ln (-6.77, 0.182) | ln (-6.84, 0.243) |
| Monthly mortality rate for PLHIV on ART (CD4: 200-499), Female Black HET     |                   |                   |                   |                   |                   |                   |
| <i>PE</i>                                                                    | 0.000694          | 0.000732          | 0.000862          | 0.000694          | 0.000732          | 0.000690          |
| <i>Distribution</i>                                                          | ln (-7.27, 0.159) | ln (-7.22, 0.159) | ln (-7.06, 0.196) | ln (-7.27, 0.159) | ln (-7.22, 0.159) | ln (-7.28, 0.216) |
| Monthly mortality rate for PLHIV on ART (CD4: 200-499), Female Hispanic PWID |                   |                   |                   |                   |                   |                   |
| <i>PE</i>                                                                    | 0.000745          | 0.000780          | 0.000917          | 0.000745          | 0.000780          | 0.000752          |
| <i>Distribution</i>                                                          | ln (-7.2, 0.215)  | ln (-7.16, 0.206) | ln (-6.99, 0.236) | ln (-7.2, 0.215)  | ln (-7.16, 0.206) | ln (-7.19, 0.26)  |
| Monthly mortality rate for PLHIV on ART (CD4: 200-499), Female Hispanic HET  |                   |                   |                   |                   |                   |                   |
| <i>PE</i>                                                                    | 0.000473          | 0.000497          | 0.000585          | 0.000473          | 0.000497          | 0.000485          |
| <i>Distribution</i>                                                          | ln (-7.66, 0.194) | ln (-7.61, 0.183) | ln (-7.44, 0.215) | ln (-7.66, 0.194) | ln (-7.61, 0.183) | ln (-7.63, 0.24)  |
| Monthly mortality rate for PLHIV on ART (CD4<200), Male White PWID           |                   |                   |                   |                   |                   |                   |
| <i>PE</i>                                                                    | 0.00798           | 0.00426           | 0.00566           | 0.00798           | 0.00426           | 0.00575           |
| <i>Distribution</i>                                                          | ln (-4.83, 0.15)  | ln (-5.46, 0.156) | ln (-5.17, 0.168) | ln (-4.83, 0.15)  | ln (-5.46, 0.156) | ln (-5.16, 0.196) |
| Monthly mortality rate for PLHIV on ART (CD4<200), Male White MSM            |                   |                   |                   |                   |                   |                   |
| <i>PE</i>                                                                    | 0.00556           | 0.00295           | 0.00393           | 0.00556           | 0.00295           | 0.00409           |
| <i>Distribution</i>                                                          | ln (-5.19, 0.117) | ln (-5.82, 0.138) | ln (-5.54, 0.125) | ln (-5.19, 0.117) | ln (-5.82, 0.138) | ln (-5.5, 0.154)  |
| Monthly mortality rate for PLHIV on ART (CD4<200), Male White MWID           |                   |                   |                   |                   |                   |                   |
| <i>PE</i>                                                                    | 0.00891           | 0.00475           | 0.00632           | 0.00891           | 0.00475           | 0.00649           |
| <i>Distribution</i>                                                          | ln (-4.72, 0.148) | ln (-5.35, 0.148) | ln (-5.06, 0.148) | ln (-4.72, 0.148) | ln (-5.35, 0.148) | ln (-5.04, 0.181) |
| Monthly mortality rate for PLHIV on ART (CD4<200), Male White HET            |                   |                   |                   |                   |                   |                   |

|                                                                         |                   |                   |                   |                   |                   |                   |
|-------------------------------------------------------------------------|-------------------|-------------------|-------------------|-------------------|-------------------|-------------------|
| <i>PE</i>                                                               | 0.00498           | 0.00265           | 0.00353           | 0.00498           | 0.00265           | 0.00363           |
| <i>Distribution</i>                                                     | ln (-5.3, 0.136)  | ln (-5.93, 0.15)  | ln (-5.65, 0.16)  | ln (-5.3, 0.136)  | ln (-5.93, 0.15)  | ln (-5.62, 0.169) |
| Monthly mortality rate for PLHIV on ART (CD4<200), Male Black PWID      |                   |                   |                   |                   |                   |                   |
| <i>PE</i>                                                               | 0.00718           | 0.00384           | 0.00510           | 0.00718           | 0.00384           | 0.00504           |
| <i>Distribution</i>                                                     | ln (-4.94, 0.117) | ln (-5.56, 0.137) | ln (-5.28, 0.168) | ln (-4.94, 0.117) | ln (-5.56, 0.137) | ln (-5.29, 0.191) |
| Monthly mortality rate for PLHIV on ART (CD4<200), Male Black MSM       |                   |                   |                   |                   |                   |                   |
| <i>PE</i>                                                               | 0.00500           | 0.00266           | 0.00355           | 0.00500           | 0.00266           | 0.00359           |
| <i>Distribution</i>                                                     | ln (-5.3, 0.107)  | ln (-5.93, 0.129) | ln (-5.64, 0.14)  | ln (-5.3, 0.107)  | ln (-5.93, 0.129) | ln (-5.63, 0.166) |
| Monthly mortality rate for PLHIV on ART (CD4<200), Male Black MWID      |                   |                   |                   |                   |                   |                   |
| <i>PE</i>                                                               | 0.00802           | 0.00428           | 0.00569           | 0.00802           | 0.00428           | 0.00569           |
| <i>Distribution</i>                                                     | ln (-4.83, 0.146) | ln (-5.45, 0.162) | ln (-5.17, 0.167) | ln (-4.83, 0.146) | ln (-5.45, 0.162) | ln (-5.17, 0.198) |
| Monthly mortality rate for PLHIV on ART (CD4<200), Male Black HET       |                   |                   |                   |                   |                   |                   |
| <i>PE</i>                                                               | 0.00449           | 0.00239           | 0.00318           | 0.00449           | 0.00239           | 0.00318           |
| <i>Distribution</i>                                                     | ln (-5.41, 0.102) | ln (-6.04, 0.122) | ln (-5.75, 0.156) | ln (-5.41, 0.102) | ln (-6.04, 0.122) | ln (-5.75, 0.168) |
| Monthly mortality rate for PLHIV on ART (CD4<200), Male Hispanic PWID   |                   |                   |                   |                   |                   |                   |
| <i>PE</i>                                                               | 0.00616           | 0.00328           | 0.00437           | 0.00616           | 0.00328           | 0.00430           |
| <i>Distribution</i>                                                     | ln (-5.09, 0.149) | ln (-5.72, 0.16)  | ln (-5.43, 0.178) | ln (-5.09, 0.149) | ln (-5.72, 0.16)  | ln (-5.45, 0.192) |
| Monthly mortality rate for PLHIV on ART (CD4<200), Male Hispanic MSM    |                   |                   |                   |                   |                   |                   |
| <i>PE</i>                                                               | 0.00429           | 0.00228           | 0.00303           | 0.00429           | 0.00228           | 0.00306           |
| <i>Distribution</i>                                                     | ln (-5.45, 0.125) | ln (-6.09, 0.145) | ln (-5.8, 0.164)  | ln (-5.45, 0.125) | ln (-6.09, 0.145) | ln (-5.79, 0.174) |
| Monthly mortality rate for PLHIV on ART (CD4<200), Male Hispanic MWID   |                   |                   |                   |                   |                   |                   |
| <i>PE</i>                                                               | 0.00688           | 0.00366           | 0.00487           | 0.00688           | 0.00366           | 0.00486           |
| <i>Distribution</i>                                                     | ln (-4.98, 0.163) | ln (-5.61, 0.172) | ln (-5.32, 0.193) | ln (-4.98, 0.163) | ln (-5.61, 0.172) | ln (-5.33, 0.204) |
| Monthly mortality rate for PLHIV on ART (CD4<200), Male Hispanic HET    |                   |                   |                   |                   |                   |                   |
| <i>PE</i>                                                               | 0.00384           | 0.00204           | 0.00272           | 0.00384           | 0.00204           | 0.00271           |
| <i>Distribution</i>                                                     | ln (-5.56, 0.135) | ln (-6.19, 0.149) | ln (-5.91, 0.166) | ln (-5.56, 0.135) | ln (-6.19, 0.149) | ln (-5.91, 0.177) |
| Monthly mortality rate for PLHIV on ART (CD4<200), Female White PWID    |                   |                   |                   |                   |                   |                   |
| <i>PE</i>                                                               | 0.00856           | 0.00457           | 0.00608           | 0.00856           | 0.00457           | 0.00612           |
| <i>Distribution</i>                                                     | ln (-4.76, 0.166) | ln (-5.39, 0.169) | ln (-5.1, 0.181)  | ln (-4.76, 0.166) | ln (-5.39, 0.169) | ln (-5.1, 0.208)  |
| Monthly mortality rate for PLHIV on ART (CD4<200), Female White HET     |                   |                   |                   |                   |                   |                   |
| <i>PE</i>                                                               | 0.00534           | 0.00284           | 0.00378           | 0.00534           | 0.00284           | 0.00386           |
| <i>Distribution</i>                                                     | ln (-5.23, 0.142) | ln (-5.86, 0.167) | ln (-5.58, 0.172) | ln (-5.23, 0.142) | ln (-5.86, 0.167) | ln (-5.56, 0.189) |
| Monthly mortality rate for PLHIV on ART (CD4<200), Female Black PWID    |                   |                   |                   |                   |                   |                   |
| <i>PE</i>                                                               | 0.00770           | 0.00412           | 0.00547           | 0.00770           | 0.00412           | 0.00537           |
| <i>Distribution</i>                                                     | ln (-4.87, 0.132) | ln (-5.49, 0.149) | ln (-5.21, 0.178) | ln (-4.87, 0.132) | ln (-5.49, 0.149) | ln (-5.23, 0.196) |
| Monthly mortality rate for PLHIV on ART (CD4<200), Female Black HET     |                   |                   |                   |                   |                   |                   |
| <i>PE</i>                                                               | 0.00481           | 0.00256           | 0.00341           | 0.00481           | 0.00256           | 0.00339           |
| <i>Distribution</i>                                                     | ln (-5.34, 0.112) | ln (-5.97, 0.138) | ln (-5.68, 0.161) | ln (-5.34, 0.112) | ln (-5.97, 0.138) | ln (-5.69, 0.179) |
| Monthly mortality rate for PLHIV on ART (CD4<200), Female Hispanic PWID |                   |                   |                   |                   |                   |                   |
| <i>PE</i>                                                               | 0.00661           | 0.00352           | 0.00468           | 0.00661           | 0.00352           | 0.00458           |
| <i>Distribution</i>                                                     | ln (-5.02, 0.173) | ln (-5.65, 0.177) | ln (-5.36, 0.199) | ln (-5.02, 0.173) | ln (-5.65, 0.177) | ln (-5.39, 0.204) |
| Monthly mortality rate for PLHIV on ART (CD4<200), Female Hispanic HET  |                   |                   |                   |                   |                   |                   |
| <i>PE</i>                                                               | 0.00412           | 0.00219           | 0.00292           | 0.00412           | 0.00219           | 0.00289           |
| <i>Distribution</i>                                                     | ln (-5.49, 0.15)  | ln (-6.12, 0.159) | ln (-5.84, 0.177) | ln (-5.49, 0.15)  | ln (-6.12, 0.159) | ln (-5.85, 0.196) |
| <b>IMMEDIATE ART ENGAGEMENT</b>                                         |                   |                   |                   |                   |                   |                   |

|                                                                                      |                 |                 |                |                 |                 |                 |
|--------------------------------------------------------------------------------------|-----------------|-----------------|----------------|-----------------|-----------------|-----------------|
| Probability of direct ART engagement following diagnosis (CD4>500), PWID             |                 |                 |                |                 |                 |                 |
| <i>PE</i>                                                                            | 0.226           | 0.226           | 0.226          | 0.226           | 0.226           | 0.226           |
| <i>Distribution</i>                                                                  | Beta (12, 41)   | Beta (12, 41)   | Beta (12, 41)  | Beta (12, 41)   | Beta (12, 41)   | Beta (12, 41)   |
| Probability of direct ART engagement following diagnosis (CD4>500), MWID             |                 |                 |                |                 |                 |                 |
| <i>PE</i>                                                                            | 0.200           | 0.200           | 0.200          | 0.200           | 0.200           | 0.200           |
| <i>Distribution</i>                                                                  | Beta (8, 32)    | Beta (8, 32)    | Beta (8, 32)   | Beta (8, 32)    | Beta (8, 32)    | Beta (8, 32)    |
| Probability of direct ART engagement following diagnosis (CD4>500), MSM              |                 |                 |                |                 |                 |                 |
| <i>PE</i>                                                                            | 0.146           | 0.349           | 0.251          | 0.146           | 0.349           | 0.349           |
| <i>Distribution</i>                                                                  | Beta (66, 387)  | Beta (176, 329) | Beta (44, 131) | Beta (66, 387)  | Beta (176, 329) | Beta (176, 329) |
| Probability of direct ART engagement following diagnosis (CD4>500), Male, HET        |                 |                 |                |                 |                 |                 |
| <i>PE</i>                                                                            | 0.0893          | 0.421           | 0.105          | 0.0893          | 0.421           | 0.421           |
| <i>Distribution</i>                                                                  | Beta (10, 102)  | Beta (40, 55)   | Beta (2, 17)   | Beta (10, 102)  | Beta (40, 55)   | Beta (40, 55)   |
| Probability of direct ART engagement following diagnosis (CD4>500), Female, HET      |                 |                 |                |                 |                 |                 |
| <i>PE</i>                                                                            | 0.165           | 0.281           | 0.269          | 0.165           | 0.281           | 0.281           |
| <i>Distribution</i>                                                                  | Beta (36, 182)  | Beta (27, 69)   | Beta (7, 19)   | Beta (36, 182)  | Beta (27, 69)   | Beta (27, 69)   |
| Probability of direct ART engagement following diagnosis (CD4: 200-499), PWID        |                 |                 |                |                 |                 |                 |
| <i>PE</i>                                                                            | 0.294           | 0.294           | 0.294          | 0.294           | 0.294           | 0.294           |
| <i>Distribution</i>                                                                  | Beta (15, 36)   | Beta (15, 36)   | Beta (15, 36)  | Beta (15, 36)   | Beta (15, 36)   | Beta (15, 36)   |
| Probability of direct ART engagement following diagnosis (CD4: 200-499), MWID        |                 |                 |                |                 |                 |                 |
| <i>PE</i>                                                                            | 0.333           | 0.333           | 0.333          | 0.333           | 0.333           | 0.333           |
| <i>Distribution</i>                                                                  | Beta (10, 20)   | Beta (10, 20)   | Beta (10, 20)  | Beta (10, 20)   | Beta (10, 20)   | Beta (10, 20)   |
| Probability of direct ART engagement following diagnosis (CD4: 200-499), MSM         |                 |                 |                |                 |                 |                 |
| <i>PE</i>                                                                            | 0.265           | 0.435           | 0.321          | 0.265           | 0.435           | 0.435           |
| <i>Distribution</i>                                                                  | Beta (198, 550) | Beta (237, 308) | Beta (69, 146) | Beta (198, 550) | Beta (237, 308) | Beta (237, 308) |
| Probability of direct ART engagement following diagnosis (CD4: 200-499), Male, HET   |                 |                 |                |                 |                 |                 |
| <i>PE</i>                                                                            | 0.349           | 0.297           | 0.246          | 0.349           | 0.297           | 0.297           |
| <i>Distribution</i>                                                                  | Beta (84, 157)  | Beta (35, 83)   | Beta (15, 46)  | Beta (84, 157)  | Beta (35, 83)   | Beta (35, 83)   |
| Probability of direct ART engagement following diagnosis (CD4: 200-499), Female, HET |                 |                 |                |                 |                 |                 |
| <i>PE</i>                                                                            | 0.295           | 0.424           | 0.425          | 0.295           | 0.424           | 0.424           |
| <i>Distribution</i>                                                                  | Beta (80, 191)  | Beta (39, 53)   | Beta (17, 23)  | Beta (80, 191)  | Beta (39, 53)   | Beta (39, 53)   |
| Probability of direct ART engagement following diagnosis (CD4<200), PWID             |                 |                 |                |                 |                 |                 |
| <i>PE</i>                                                                            | 0.515           | 0.515           | 0.515          | 0.515           | 0.515           | 0.515           |
| <i>Distribution</i>                                                                  | Beta (34, 32)   | Beta (34, 32)   | Beta (34, 32)  | Beta (34, 32)   | Beta (34, 32)   | Beta (34, 32)   |
| Probability of direct ART engagement following diagnosis (CD4<200), MWID             |                 |                 |                |                 |                 |                 |
| <i>PE</i>                                                                            | 0.545           | 0.545           | 0.545          | 0.545           | 0.545           | 0.545           |
| <i>Distribution</i>                                                                  | Beta (12, 10)   | Beta (12, 10)   | Beta (12, 10)  | Beta (12, 10)   | Beta (12, 10)   | Beta (12, 10)   |
| Probability of direct ART engagement following diagnosis (CD4<200), MSM              |                 |                 |                |                 |                 |                 |
| <i>PE</i>                                                                            | 0.526           | 0.596           | 0.644          | 0.526           | 0.596           | 0.596           |
| <i>Distribution</i>                                                                  | Beta (242, 218) | Beta (115, 78)  | Beta (87, 48)  | Beta (242, 218) | Beta (115, 78)  | Beta (115, 78)  |
| Probability of direct ART engagement following diagnosis (CD4<200), Male, HET        |                 |                 |                |                 |                 |                 |
| <i>PE</i>                                                                            | 0.460           | 0.577           | 0.701          | 0.460           | 0.577           | 0.577           |
| <i>Distribution</i>                                                                  | Beta (159, 187) | Beta (45, 33)   | Beta (47, 20)  | Beta (159, 187) | Beta (45, 33)   | Beta (45, 33)   |
| Probability of direct ART engagement following diagnosis (CD4<200), Female, HET      |                 |                 |                |                 |                 |                 |
| <i>PE</i>                                                                            | 0.457           | 0.475           | 0.486          | 0.457           | 0.475           | 0.475           |
| <i>Distribution</i>                                                                  | Beta (100, 119) | Beta (28, 31)   | Beta (18, 19)  | Beta (100, 119) | Beta (28, 31)   | Beta (28, 31)   |

| <b>ART ENGAGEMENT: INITIATION</b>                              |                            |                            |                            |                            |                            |                            |
|----------------------------------------------------------------|----------------------------|----------------------------|----------------------------|----------------------------|----------------------------|----------------------------|
| <b>Monthly ART initiation rate (CD4&gt;500), PWID</b>          |                            |                            |                            |                            |                            |                            |
| <i>PE</i>                                                      | 0.0292                     | 0.0292                     | 0.0292                     | 0.0292                     | 0.0292                     | 0.0292                     |
| <i>Distribution</i>                                            | Poisson (23) /<br>789.01   |
| <b>Monthly ART initiation rate (CD4&gt;500), MSM</b>           |                            |                            |                            |                            |                            |                            |
| <i>PE</i>                                                      | 0.0556                     | 0.0662                     | 0.0853                     | 0.0556                     | 0.0662                     | 0.0662                     |
| <i>Distribution</i>                                            | Poisson (280) /<br>5039.22 | Poisson (259) /<br>3914.6  | Poisson (107) /<br>1254.01 | Poisson (280) /<br>5039.22 | Poisson (259) /<br>3914.6  | Poisson (259) /<br>3914.6  |
| <b>Monthly ART initiation rate (CD4&gt;500), MWID</b>          |                            |                            |                            |                            |                            |                            |
| <i>PE</i>                                                      | 0.0690                     | 0.0690                     | 0.0690                     | 0.0690                     | 0.0690                     | 0.0690                     |
| <i>Distribution</i>                                            | Poisson (23) /<br>333.49   |
| <b>Monthly ART initiation rate (CD4&gt;500), Male, HET</b>     |                            |                            |                            |                            |                            |                            |
| <i>PE</i>                                                      | 0.0425                     | 0.0782                     | 0.0800                     | 0.0425                     | 0.0782                     | 0.0782                     |
| <i>Distribution</i>                                            | Poisson (65) /<br>1529.89  | Poisson (38) /<br>486.15   | Poisson (14) /<br>174.99   | Poisson (65) /<br>1529.89  | Poisson (38) /<br>486.15   | Poisson (38) /<br>486.15   |
| <b>Monthly ART initiation rate (CD4&gt;500), Female, HET</b>   |                            |                            |                            |                            |                            |                            |
| <i>PE</i>                                                      | 0.0398                     | 0.0551                     | 0.0866                     | 0.0398                     | 0.0551                     | 0.0551                     |
| <i>Distribution</i>                                            | Poisson (120) /<br>3011.48 | Poisson (46) /<br>834.31   | Poisson (17) /<br>196.37   | Poisson (120) /<br>3011.48 | Poisson (46) /<br>834.31   | Poisson (46) /<br>834.31   |
| <b>Monthly ART initiation rate (CD4: 200-499), PWID</b>        |                            |                            |                            |                            |                            |                            |
| <i>PE</i>                                                      | 0.108                      | 0.108                      | 0.108                      | 0.108                      | 0.108                      | 0.108                      |
| <i>Distribution</i>                                            | Poisson (30) /<br>277.24   |
| <b>Monthly ART initiation rate (CD4: 200-499), MSM</b>         |                            |                            |                            |                            |                            |                            |
| <i>PE</i>                                                      | 0.145                      | 0.149                      | 0.184                      | 0.145                      | 0.149                      | 0.149                      |
| <i>Distribution</i>                                            | Poisson (490) /<br>3375.28 | Poisson (271) /<br>1823.46 | Poisson (131) /<br>710.62  | Poisson (490) /<br>3375.28 | Poisson (271) /<br>1823.46 | Poisson (271) /<br>1823.46 |
| <b>Monthly ART initiation rate (CD4: 200-499), MWID</b>        |                            |                            |                            |                            |                            |                            |
| <i>PE</i>                                                      | 0.0573                     | 0.0573                     | 0.0573                     | 0.0573                     | 0.0573                     | 0.0573                     |
| <i>Distribution</i>                                            | Poisson (14) /<br>244.44   |
| <b>Monthly ART initiation rate (CD4: 200-499), Male, HET</b>   |                            |                            |                            |                            |                            |                            |
| <i>PE</i>                                                      | 0.118                      | 0.189                      | 0.134                      | 0.118                      | 0.189                      | 0.189                      |
| <i>Distribution</i>                                            | Poisson (134) /<br>1135.85 | Poisson (74) /<br>390.83   | Poisson (42) /<br>312.92   | Poisson (134) /<br>1135.85 | Poisson (74) /<br>390.83   | Poisson (74) /<br>390.83   |
| <b>Monthly ART initiation rate (CD4: 200-499), Female, HET</b> |                            |                            |                            |                            |                            |                            |
| <i>PE</i>                                                      | 0.142                      | 0.125                      | 0.149                      | 0.142                      | 0.125                      | 0.125                      |
| <i>Distribution</i>                                            | Poisson (175) /<br>1231.67 | Poisson (46) /<br>368.53   | Poisson (21) /<br>141.34   | Poisson (175) /<br>1231.67 | Poisson (46) /<br>368.53   | Poisson (46) /<br>368.53   |
| <b>Monthly ART initiation rate (CD4&lt;200), PWID</b>          |                            |                            |                            |                            |                            |                            |
| <i>PE</i>                                                      | 0.314                      | 0.314                      | 0.314                      | 0.314                      | 0.314                      | 0.314                      |
| <i>Distribution</i>                                            | Poisson (31) / 98.84       |
| <b>Monthly ART initiation rate (CD4&lt;200), MSM</b>           |                            |                            |                            |                            |                            |                            |
| <i>PE</i>                                                      | 0.282                      | 0.257                      | 0.190                      | 0.282                      | 0.257                      | 0.257                      |
| <i>Distribution</i>                                            | Poisson (206) /<br>730.76  | Poisson (74) /<br>287.61   | Poisson (43) / 226.7       | Poisson (206) /<br>730.76  | Poisson (74) /<br>287.61   | Poisson (74) /<br>287.61   |
| <b>Monthly ART initiation rate (CD4&lt;200), MWID</b>          |                            |                            |                            |                            |                            |                            |
| <i>PE</i>                                                      | 0.240                      | 0.240                      | 0.240                      | 0.240                      | 0.240                      | 0.240                      |
| <i>Distribution</i>                                            | Poisson (9) / 37.45        |
| <b>Monthly ART initiation rate (CD4&lt;200), Male, HET</b>     |                            |                            |                            |                            |                            |                            |
| <i>PE</i>                                                      | 0.262                      | 0.230                      | 0.182                      | 0.262                      | 0.230                      | 0.230                      |



|                                                        |                        |                      |                      |                        |                      |                       |
|--------------------------------------------------------|------------------------|----------------------|----------------------|------------------------|----------------------|-----------------------|
| <i>Distribution</i>                                    | Poisson (180) / 686.23 | Poisson (28) / 121.9 | Poisson (18) / 98.92 | Poisson (180) / 686.23 | Poisson (28) / 121.9 | Poisson (28) / 121.9  |
| Monthly ART initiation rate (CD4<200), Female, HET     |                        |                      |                      |                        |                      |                       |
| <i>PE</i>                                              | 0.296                  | 0.113                | 0.294                | 0.296                  | 0.113                | 0.113                 |
| <i>Distribution</i>                                    | Poisson (112) / 378.97 | Poisson (24) / 212.4 | Poisson (19) / 64.72 | Poisson (112) / 378.97 | Poisson (24) / 212.4 | Poisson (24) / 212.4  |
| <b>ART ENGAGEMENT: RETENTION</b>                       |                        |                      |                      |                        |                      |                       |
| Monthly ART dropout rate (CD4>500), Male White PWID    |                        |                      |                      |                        |                      |                       |
| <i>PE</i>                                              | 0.0191                 | 0.00725              | 0.00970              | 0.0191                 | 0.00725              | 0.00427               |
| <i>Distribution</i>                                    | ln (-3.96, 0.0689)     | ln (-4.93, 0.098)    | ln (-4.64, 0.1369)   | ln (-3.96, 0.0689)     | ln (-4.93, 0.098)    | Unif (0.0034, 0.0051) |
| Monthly ART dropout rate (CD4>500), Male White MSM     |                        |                      |                      |                        |                      |                       |
| <i>PE</i>                                              | 0.0132                 | 0.00398              | 0.00920              | 0.0132                 | 0.00398              | 0.00340               |
| <i>Distribution</i>                                    | ln (-4.33, 0.0428)     | ln (-5.53, 0.0551)   | ln (-4.69, 0.0503)   | ln (-4.33, 0.0428)     | ln (-5.53, 0.0551)   | Unif (0.0027, 0.0041) |
| Monthly ART dropout rate (CD4>500), Male White MWID    |                        |                      |                      |                        |                      |                       |
| <i>PE</i>                                              | 0.0189                 | 0.00442              | 0.0114               | 0.0189                 | 0.00442              | 0.00340               |
| <i>Distribution</i>                                    | ln (-3.97, 0.0644)     | ln (-5.42, 0.0995)   | ln (-4.48, 0.1018)   | ln (-3.97, 0.0644)     | ln (-5.42, 0.0995)   | Unif (0.0027, 0.0041) |
| Monthly ART dropout rate (CD4>500), Male White HET     |                        |                      |                      |                        |                      |                       |
| <i>PE</i>                                              | 0.0133                 | 0.00654              | 0.00784              | 0.0133                 | 0.00654              | 0.00516               |
| <i>Distribution</i>                                    | ln (-4.32, 0.0587)     | ln (-5.03, 0.0905)   | ln (-4.85, 0.1122)   | ln (-4.32, 0.0587)     | ln (-5.03, 0.0905)   | Unif (0.0041, 0.0062) |
| Monthly ART dropout rate (CD4>500), Male Black PWID    |                        |                      |                      |                        |                      |                       |
| <i>PE</i>                                              | 0.0182                 | 0.00725              | 0.00919              | 0.0182                 | 0.00725              | 0.00427               |
| <i>Distribution</i>                                    | ln (-4, 0.0607)        | ln (-4.93, 0.0901)   | ln (-4.69, 0.1454)   | ln (-4, 0.0607)        | ln (-4.93, 0.0901)   | Unif (0.0034, 0.0051) |
| Monthly ART dropout rate (CD4>500), Male Black MSM     |                        |                      |                      |                        |                      |                       |
| <i>PE</i>                                              | 0.0125                 | 0.00398              | 0.00871              | 0.0125                 | 0.00398              | 0.00703               |
| <i>Distribution</i>                                    | ln (-4.38, 0.0404)     | ln (-5.53, 0.061)    | ln (-4.74, 0.0942)   | ln (-4.38, 0.0404)     | ln (-5.53, 0.061)    | Unif (0.0056, 0.0084) |
| Monthly ART dropout rate (CD4>500), Male Black MWID    |                        |                      |                      |                        |                      |                       |
| <i>PE</i>                                              | 0.0180                 | 0.00442              | 0.0108               | 0.0180                 | 0.00442              | 0.00571               |
| <i>Distribution</i>                                    | ln (-4.02, 0.0622)     | ln (-5.42, 0.1008)   | ln (-4.53, 0.1372)   | ln (-4.02, 0.0622)     | ln (-5.42, 0.1008)   | Unif (0.0046, 0.0069) |
| Monthly ART dropout rate (CD4>500), Male Black HET     |                        |                      |                      |                        |                      |                       |
| <i>PE</i>                                              | 0.0127                 | 0.00654              | 0.00743              | 0.0127                 | 0.00654              | 0.00516               |
| <i>Distribution</i>                                    | ln (-4.37, 0.0453)     | ln (-5.03, 0.0689)   | ln (-4.9, 0.1276)    | ln (-4.37, 0.0453)     | ln (-5.03, 0.0689)   | Unif (0.0041, 0.0062) |
| Monthly ART dropout rate (CD4>500), Male Hispanic PWID |                        |                      |                      |                        |                      |                       |
| <i>PE</i>                                              | 0.0109                 | 0.00744              | 0.00595              | 0.0109                 | 0.00744              | 0.00475               |
| <i>Distribution</i>                                    | ln (-4.52, 0.0802)     | ln (-4.9, 0.0928)    | ln (-5.12, 0.1507)   | ln (-4.52, 0.0802)     | ln (-4.9, 0.0928)    | Unif (0.0038, 0.0057) |
| Monthly ART dropout rate (CD4>500), Male Hispanic MSM  |                        |                      |                      |                        |                      |                       |
| <i>PE</i>                                              | 0.0075                 | 0.00408              | 0.00564              | 0.0075                 | 0.00408              | 0.00340               |
| <i>Distribution</i>                                    | ln (-4.9, 0.0625)      | ln (-5.5, 0.0624)    | ln (-5.18, 0.0912)   | ln (-4.9, 0.0625)      | ln (-5.5, 0.0624)    | Unif (0.0027, 0.0041) |
| Monthly ART dropout rate (CD4>500), Male Hispanic MWID |                        |                      |                      |                        |                      |                       |
| <i>PE</i>                                              | 0.0107                 | 0.00453              | 0.00698              | 0.0107                 | 0.00453              | 0.00340               |
| <i>Distribution</i>                                    | ln (-4.53, 0.0832)     | ln (-5.4, 0.1066)    | ln (-4.96, 0.1318)   | ln (-4.53, 0.0832)     | ln (-5.4, 0.1066)    | Unif (0.0027, 0.0041) |
| Monthly ART dropout rate (CD4>500), Male Hispanic HET  |                        |                      |                      |                        |                      |                       |
| <i>PE</i>                                              | 0.0076                 | 0.00670              | 0.00481              | 0.0076                 | 0.00670              | 0.00516               |
| <i>Distribution</i>                                    | ln (-4.89, 0.0696)     | ln (-5.01, 0.0727)   | ln (-5.34, 0.1294)   | ln (-4.89, 0.0696)     | ln (-5.01, 0.0727)   | Unif (0.0041, 0.0062) |

|                                                          |                    |                    |                    |                    |                    |                       |
|----------------------------------------------------------|--------------------|--------------------|--------------------|--------------------|--------------------|-----------------------|
| Monthly ART dropout rate (CD4>500), Female White PWID    |                    |                    |                    |                    |                    |                       |
| <i>PE</i>                                                | 0.0191             | 0.00725            | 0.00970            | 0.0191             | 0.00725            | 0.00427               |
| <i>Distribution</i>                                      | ln (-3.96, 0.0695) | ln (-4.93, 0.0993) | ln (-4.64, 0.1272) | ln (-3.96, 0.0695) | ln (-4.93, 0.0993) | Unif (0.0034, 0.0051) |
| Monthly ART dropout rate (CD4>500), Female White HET     |                    |                    |                    |                    |                    |                       |
| <i>PE</i>                                                | 0.0133             | 0.00654            | 0.00784            | 0.0133             | 0.00654            | 0.00340               |
| <i>Distribution</i>                                      | ln (-4.32, 0.0601) | ln (-5.03, 0.0889) | ln (-4.85, 0.1169) | ln (-4.32, 0.0601) | ln (-5.03, 0.0889) | Unif (0.0027, 0.0041) |
| Monthly ART dropout rate (CD4>500), Female Black PWID    |                    |                    |                    |                    |                    |                       |
| <i>PE</i>                                                | 0.0182             | 0.00725            | 0.00919            | 0.0182             | 0.00725            | 0.00427               |
| <i>Distribution</i>                                      | ln (-4, 0.055)     | ln (-4.93, 0.0924) | ln (-4.69, 0.1437) | ln (-4, 0.055)     | ln (-4.93, 0.0924) | Unif (0.0034, 0.0051) |
| Monthly ART dropout rate (CD4>500), Female Black HET     |                    |                    |                    |                    |                    |                       |
| <i>PE</i>                                                | 0.0127             | 0.00654            | 0.00743            | 0.0127             | 0.00654            | 0.00340               |
| <i>Distribution</i>                                      | ln (-4.37, 0.0444) | ln (-5.03, 0.0713) | ln (-4.9, 0.1333)  | ln (-4.37, 0.0444) | ln (-5.03, 0.0713) | Unif (0.0027, 0.0041) |
| Monthly ART dropout rate (CD4>500), Female Hispanic PWID |                    |                    |                    |                    |                    |                       |
| <i>PE</i>                                                | 0.0109             | 0.00744            | 0.00595            | 0.0109             | 0.00744            | 0.00427               |
| <i>Distribution</i>                                      | ln (-4.52, 0.0789) | ln (-4.9, 0.0933)  | ln (-5.12, 0.1518) | ln (-4.52, 0.0789) | ln (-4.9, 0.0933)  | Unif (0.0034, 0.0051) |
| Monthly ART dropout rate (CD4>500), Female Hispanic HET  |                    |                    |                    |                    |                    |                       |
| <i>PE</i>                                                | 0.0076             | 0.00670            | 0.00481            | 0.0076             | 0.00670            | 0.00340               |
| <i>Distribution</i>                                      | ln (-4.89, 0.0662) | ln (-5.01, 0.075)  | ln (-5.34, 0.1309) | ln (-4.89, 0.0662) | ln (-5.01, 0.075)  | Unif (0.0027, 0.0041) |
| Monthly ART dropout rate (CD4: 200-499), Male White PWID |                    |                    |                    |                    |                    |                       |
| <i>PE</i>                                                | 0.0262             | 0.00925            | 0.0128             | 0.0262             | 0.00925            | 0.00427               |
| <i>Distribution</i>                                      | ln (-3.64, 0.0669) | ln (-4.68, 0.1123) | ln (-4.36, 0.1218) | ln (-3.64, 0.0669) | ln (-4.68, 0.1123) | Unif (0.0034, 0.0051) |
| Monthly ART dropout rate (CD4: 200-499), Male White MSM  |                    |                    |                    |                    |                    |                       |
| <i>PE</i>                                                | 0.0141             | 0.00661            | 0.0110             | 0.0141             | 0.00661            | 0.00340               |
| <i>Distribution</i>                                      | ln (-4.26, 0.0449) | ln (-5.02, 0.063)  | ln (-4.51, 0.0601) | ln (-4.26, 0.0449) | ln (-5.02, 0.063)  | Unif (0.0027, 0.0041) |
| Monthly ART dropout rate (CD4: 200-499), Male White MWID |                    |                    |                    |                    |                    |                       |
| <i>PE</i>                                                | 0.0235             | 0.00703            | 0.0134             | 0.0235             | 0.00703            | 0.00340               |
| <i>Distribution</i>                                      | ln (-3.75, 0.0691) | ln (-4.96, 0.1073) | ln (-4.31, 0.1129) | ln (-3.75, 0.0691) | ln (-4.96, 0.1073) | Unif (0.0027, 0.0041) |
| Monthly ART dropout rate (CD4: 200-499), Male White HET  |                    |                    |                    |                    |                    |                       |
| <i>PE</i>                                                | 0.0157             | 0.00871            | 0.0105             | 0.0157             | 0.00871            | 0.00516               |
| <i>Distribution</i>                                      | ln (-4.16, 0.0583) | ln (-4.74, 0.0937) | ln (-4.56, 0.1137) | ln (-4.16, 0.0583) | ln (-4.74, 0.0937) | Unif (0.0041, 0.0062) |
| Monthly ART dropout rate (CD4: 200-499), Male Black PWID |                    |                    |                    |                    |                    |                       |
| <i>PE</i>                                                | 0.0296             | 0.00939            | 0.0143             | 0.0296             | 0.00939            | 0.00427               |
| <i>Distribution</i>                                      | ln (-3.52, 0.054)  | ln (-4.67, 0.0893) | ln (-4.25, 0.1435) | ln (-3.52, 0.054)  | ln (-4.67, 0.0893) | Unif (0.0034, 0.0051) |
| Monthly ART dropout rate (CD4: 200-499), Male Black MSM  |                    |                    |                    |                    |                    |                       |
| <i>PE</i>                                                | 0.0159             | 0.00671            | 0.0123             | 0.0159             | 0.00671            | 0.00703               |
| <i>Distribution</i>                                      | ln (-4.14, 0.0407) | ln (-5, 0.0679)    | ln (-4.4, 0.0986)  | ln (-4.14, 0.0407) | ln (-5, 0.0679)    | Unif (0.0056, 0.0084) |
| Monthly ART dropout rate (CD4: 200-499), Male Black MWID |                    |                    |                    |                    |                    |                       |
| <i>PE</i>                                                | 0.0266             | 0.00713            | 0.0150             | 0.0266             | 0.00713            | 0.00571               |
| <i>Distribution</i>                                      | ln (-3.63, 0.0605) | ln (-4.94, 0.1093) | ln (-4.2, 0.1381)  | ln (-3.63, 0.0605) | ln (-4.94, 0.1093) | Unif (0.0046, 0.0069) |
| Monthly ART dropout rate (CD4: 200-499), Male Black HET  |                    |                    |                    |                    |                    |                       |
| <i>PE</i>                                                | 0.0177             | 0.00884            | 0.0117             | 0.0177             | 0.00884            | 0.00516               |

|                                                               |                    |                    |                    |                    |                    |                       |
|---------------------------------------------------------------|--------------------|--------------------|--------------------|--------------------|--------------------|-----------------------|
| <i>Distribution</i>                                           | ln (-4.03, 0.0401) | ln (-4.73, 0.0707) | ln (-4.45, 0.1183) | ln (-4.03, 0.0401) | ln (-4.73, 0.0707) | Unif (0.0041, 0.0062) |
| Monthly ART dropout rate (CD4: 200-499), Male Hispanic PWID   |                    |                    |                    |                    |                    |                       |
| <i>PE</i>                                                     | 0.0208             | 0.01032            | 0.0107             | 0.0208             | 0.01032            | 0.00475               |
| <i>Distribution</i>                                           | ln (-3.87, 0.0685) | ln (-4.57, 0.0891) | ln (-4.54, 0.1428) | ln (-3.87, 0.0685) | ln (-4.57, 0.0891) | Unif (0.0038, 0.0057) |
| Monthly ART dropout rate (CD4: 200-499), Male Hispanic MSM    |                    |                    |                    |                    |                    |                       |
| <i>PE</i>                                                     | 0.0111             | 0.00737            | 0.0092             | 0.0111             | 0.00737            | 0.00340               |
| <i>Distribution</i>                                           | ln (-4.5, 0.0544)  | ln (-4.91, 0.0678) | ln (-4.69, 0.0816) | ln (-4.5, 0.0544)  | ln (-4.91, 0.0678) | Unif (0.0027, 0.0041) |
| Monthly ART dropout rate (CD4: 200-499), Male Hispanic MWID   |                    |                    |                    |                    |                    |                       |
| <i>PE</i>                                                     | 0.0187             | 0.00784            | 0.0112             | 0.0187             | 0.00784            | 0.00340               |
| <i>Distribution</i>                                           | ln (-3.98, 0.0759) | ln (-4.85, 0.1083) | ln (-4.49, 0.1306) | ln (-3.98, 0.0759) | ln (-4.85, 0.1083) | Unif (0.0027, 0.0041) |
| Monthly ART dropout rate (CD4: 200-499), Male Hispanic HET    |                    |                    |                    |                    |                    |                       |
| <i>PE</i>                                                     | 0.0124             | 0.00971            | 0.00875            | 0.0124             | 0.00971            | 0.00516               |
| <i>Distribution</i>                                           | ln (-4.39, 0.0587) | ln (-4.63, 0.0718) | ln (-4.74, 0.1205) | ln (-4.39, 0.0587) | ln (-4.63, 0.0718) | Unif (0.0041, 0.0062) |
| Monthly ART dropout rate (CD4: 200-499), Female White PWID    |                    |                    |                    |                    |                    |                       |
| <i>PE</i>                                                     | 0.0262             | 0.00925            | 0.0128             | 0.0262             | 0.00925            | 0.00427               |
| <i>Distribution</i>                                           | ln (-3.64, 0.0704) | ln (-4.68, 0.1067) | ln (-4.36, 0.1317) | ln (-3.64, 0.0704) | ln (-4.68, 0.1067) | Unif (0.0034, 0.0051) |
| Monthly ART dropout rate (CD4: 200-499), Female White HET     |                    |                    |                    |                    |                    |                       |
| <i>PE</i>                                                     | 0.0157             | 0.00871            | 0.0105             | 0.0157             | 0.00871            | 0.00340               |
| <i>Distribution</i>                                           | ln (-4.16, 0.0577) | ln (-4.74, 0.0937) | ln (-4.56, 0.1042) | ln (-4.16, 0.0577) | ln (-4.74, 0.0937) | Unif (0.0027, 0.0041) |
| Monthly ART dropout rate (CD4: 200-499), Female Black PWID    |                    |                    |                    |                    |                    |                       |
| <i>PE</i>                                                     | 0.0296             | 0.00939            | 0.0143             | 0.0296             | 0.00939            | 0.00427               |
| <i>Distribution</i>                                           | ln (-3.52, 0.0501) | ln (-4.67, 0.0894) | ln (-4.25, 0.1317) | ln (-3.52, 0.0501) | ln (-4.67, 0.0894) | Unif (0.0034, 0.0051) |
| Monthly ART dropout rate (CD4: 200-499), Female Black HET     |                    |                    |                    |                    |                    |                       |
| <i>PE</i>                                                     | 0.0177             | 0.00884            | 0.0117             | 0.0177             | 0.00884            | 0.00340               |
| <i>Distribution</i>                                           | ln (-4.03, 0.0404) | ln (-4.73, 0.072)  | ln (-4.45, 0.1165) | ln (-4.03, 0.0404) | ln (-4.73, 0.072)  | Unif (0.0027, 0.0041) |
| Monthly ART dropout rate (CD4: 200-499), Female Hispanic PWID |                    |                    |                    |                    |                    |                       |
| <i>PE</i>                                                     | 0.0208             | 0.0103             | 0.0107             | 0.0208             | 0.0103             | 0.00427               |
| <i>Distribution</i>                                           | ln (-3.87, 0.0698) | ln (-4.57, 0.0885) | ln (-4.54, 0.1485) | ln (-3.87, 0.0698) | ln (-4.57, 0.0885) | Unif (0.0034, 0.0051) |
| Monthly ART dropout rate (CD4: 200-499), Female Hispanic HET  |                    |                    |                    |                    |                    |                       |
| <i>PE</i>                                                     | 0.0124             | 0.0097             | 0.00875            | 0.0124             | 0.0097             | 0.00340               |
| <i>Distribution</i>                                           | ln (-4.39, 0.0606) | ln (-4.63, 0.0712) | ln (-4.74, 0.1153) | ln (-4.39, 0.0606) | ln (-4.63, 0.0712) | Unif (0.0027, 0.0041) |
| Monthly ART dropout rate (CD4<200), Male White PWID           |                    |                    |                    |                    |                    |                       |
| <i>PE</i>                                                     | 0.0314             | 0.0129             | 0.0241             | 0.0314             | 0.0129             | 0.00427               |
| <i>Distribution</i>                                           | ln (-3.46, 0.0993) | ln (-4.35, 0.1465) | ln (-3.73, 0.1711) | ln (-3.46, 0.0993) | ln (-4.35, 0.1465) | Unif (0.0034, 0.0051) |
| Monthly ART dropout rate (CD4<200), Male White MSM            |                    |                    |                    |                    |                    |                       |
| <i>PE</i>                                                     | 0.0188             | 0.0113             | 0.0141             | 0.0188             | 0.0113             | 0.00340               |
| <i>Distribution</i>                                           | ln (-3.97, 0.0799) | ln (-4.49, 0.1252) | ln (-4.26, 0.1152) | ln (-3.97, 0.0799) | ln (-4.49, 0.1252) | Unif (0.0027, 0.0041) |
| Monthly ART dropout rate (CD4<200), Male White MWID           |                    |                    |                    |                    |                    |                       |
| <i>PE</i>                                                     | 0.0281             | 0.0137             | 0.0208             | 0.0281             | 0.0137             | 0.00340               |
| <i>Distribution</i>                                           | ln (-3.57, 0.0987) | ln (-4.29, 0.1621) | ln (-3.88, 0.1642) | ln (-3.57, 0.0987) | ln (-4.29, 0.1621) | Unif (0.0027, 0.0041) |
| Monthly ART dropout rate (CD4<200), Male White HET            |                    |                    |                    |                    |                    |                       |

|                                                          |                    |                    |                    |                    |                    |                       |
|----------------------------------------------------------|--------------------|--------------------|--------------------|--------------------|--------------------|-----------------------|
| <i>PE</i>                                                | 0.0210             | 0.0106             | 0.0164             | 0.0210             | 0.0106             | 0.00516               |
| <i>Distribution</i>                                      | ln (-3.86, 0.0894) | ln (-4.55, 0.1473) | ln (-4.11, 0.1571) | ln (-3.86, 0.0894) | ln (-4.55, 0.1473) | Unif (0.0041, 0.0062) |
| Monthly ART dropout rate (CD4<200), Male Black PWID      |                    |                    |                    |                    |                    |                       |
| <i>PE</i>                                                | 0.0405             | 0.0156             | 0.0259             | 0.0405             | 0.0156             | 0.00427               |
| <i>Distribution</i>                                      | ln (-3.21, 0.0774) | ln (-4.16, 0.1202) | ln (-3.65, 0.1763) | ln (-3.21, 0.0774) | ln (-4.16, 0.1202) | Unif (0.0034, 0.0051) |
| Monthly ART dropout rate (CD4<200), Male Black MSM       |                    |                    |                    |                    |                    |                       |
| <i>PE</i>                                                | 0.0243             | 0.0136             | 0.0152             | 0.0243             | 0.0136             | 0.00703               |
| <i>Distribution</i>                                      | ln (-3.72, 0.0645) | ln (-4.3, 0.1014)  | ln (-4.18, 0.1406) | ln (-3.72, 0.0645) | ln (-4.3, 0.1014)  | Unif (0.0056, 0.0084) |
| Monthly ART dropout rate (CD4<200), Male Black MWID      |                    |                    |                    |                    |                    |                       |
| <i>PE</i>                                                | 0.0363             | 0.0166             | 0.0224             | 0.0363             | 0.0166             | 0.00571               |
| <i>Distribution</i>                                      | ln (-3.32, 0.0958) | ln (-4.1, 0.1409)  | ln (-3.8, 0.1828)  | ln (-3.32, 0.0958) | ln (-4.1, 0.1409)  | Unif (0.0046, 0.0069) |
| Monthly ART dropout rate (CD4<200), Male Black HET       |                    |                    |                    |                    |                    |                       |
| <i>PE</i>                                                | 0.0272             | 0.0128             | 0.0177             | 0.0272             | 0.0128             | 0.00516               |
| <i>Distribution</i>                                      | ln (-3.61, 0.0606) | ln (-4.36, 0.1077) | ln (-4.04, 0.1541) | ln (-3.61, 0.0606) | ln (-4.36, 0.1077) | Unif (0.0041, 0.0062) |
| Monthly ART dropout rate (CD4<200), Male Hispanic PWID   |                    |                    |                    |                    |                    |                       |
| <i>PE</i>                                                | 0.0240             | 0.0170             | 0.0176             | 0.0240             | 0.0170             | 0.00475               |
| <i>Distribution</i>                                      | ln (-3.73, 0.1086) | ln (-4.07, 0.1252) | ln (-4.04, 0.2068) | ln (-3.73, 0.1086) | ln (-4.07, 0.1252) | Unif (0.0038, 0.0057) |
| Monthly ART dropout rate (CD4<200), Male Hispanic MSM    |                    |                    |                    |                    |                    |                       |
| <i>PE</i>                                                | 0.0144             | 0.0148             | 0.0103             | 0.0144             | 0.0148             | 0.00340               |
| <i>Distribution</i>                                      | ln (-4.24, 0.0903) | ln (-4.21, 0.1143) | ln (-4.57, 0.1468) | ln (-4.24, 0.0903) | ln (-4.21, 0.1143) | Unif (0.0027, 0.0041) |
| Monthly ART dropout rate (CD4<200), Male Hispanic MWID   |                    |                    |                    |                    |                    |                       |
| <i>PE</i>                                                | 0.0215             | 0.0181             | 0.0152             | 0.0215             | 0.0181             | 0.00340               |
| <i>Distribution</i>                                      | ln (-3.84, 0.1193) | ln (-4.01, 0.1516) | ln (-4.19, 0.2084) | ln (-3.84, 0.1193) | ln (-4.01, 0.1516) | Unif (0.0027, 0.0041) |
| Monthly ART dropout rate (CD4<200), Male Hispanic HET    |                    |                    |                    |                    |                    |                       |
| <i>PE</i>                                                | 0.0161             | 0.0139             | 0.0120             | 0.0161             | 0.0139             | 0.00516               |
| <i>Distribution</i>                                      | ln (-4.13, 0.0931) | ln (-4.27, 0.1027) | ln (-4.43, 0.1747) | ln (-4.13, 0.0931) | ln (-4.27, 0.1027) | Unif (0.0041, 0.0062) |
| Monthly ART dropout rate (CD4<200), Female White PWID    |                    |                    |                    |                    |                    |                       |
| <i>PE</i>                                                | 0.0314             | 0.0129             | 0.0241             | 0.0314             | 0.0129             | 0.00427               |
| <i>Distribution</i>                                      | ln (-3.46, 0.0987) | ln (-4.35, 0.149)  | ln (-3.73, 0.177)  | ln (-3.46, 0.0987) | ln (-4.35, 0.149)  | Unif (0.0034, 0.0051) |
| Monthly ART dropout rate (CD4<200), Female White HET     |                    |                    |                    |                    |                    |                       |
| <i>PE</i>                                                | 0.0210             | 0.0106             | 0.0164             | 0.0210             | 0.0106             | 0.00340               |
| <i>Distribution</i>                                      | ln (-3.86, 0.0895) | ln (-4.55, 0.1348) | ln (-4.11, 0.1504) | ln (-3.86, 0.0895) | ln (-4.55, 0.1348) | Unif (0.0027, 0.0041) |
| Monthly ART dropout rate (CD4<200), Female Black PWID    |                    |                    |                    |                    |                    |                       |
| <i>PE</i>                                                | 0.0405             | 0.0156             | 0.0259             | 0.0405             | 0.0156             | 0.00427               |
| <i>Distribution</i>                                      | ln (-3.21, 0.0761) | ln (-4.16, 0.1174) | ln (-3.65, 0.1839) | ln (-3.21, 0.0761) | ln (-4.16, 0.1174) | Unif (0.0034, 0.0051) |
| Monthly ART dropout rate (CD4<200), Female Black HET     |                    |                    |                    |                    |                    |                       |
| <i>PE</i>                                                | 0.0272             | 0.0128             | 0.0177             | 0.0272             | 0.0128             | 0.00340               |
| <i>Distribution</i>                                      | ln (-3.61, 0.0581) | ln (-4.36, 0.0961) | ln (-4.04, 0.1538) | ln (-3.61, 0.0581) | ln (-4.36, 0.0961) | Unif (0.0027, 0.0041) |
| Monthly ART dropout rate (CD4<200), Female Hispanic PWID |                    |                    |                    |                    |                    |                       |
| <i>PE</i>                                                | 0.0240             | 0.0170             | 0.0176             | 0.0240             | 0.0170             | 0.00427               |
| <i>Distribution</i>                                      | ln (-3.73, 0.1041) | ln (-4.07, 0.1338) | ln (-4.04, 0.2026) | ln (-3.73, 0.1041) | ln (-4.07, 0.1338) | Unif (0.0034, 0.0051) |

|                                                                                       |                       |                       |                       |                       |                       |                       |
|---------------------------------------------------------------------------------------|-----------------------|-----------------------|-----------------------|-----------------------|-----------------------|-----------------------|
| <b>Monthly ART dropout rate (CD4&lt;200), Female Hispanic HET</b>                     |                       |                       |                       |                       |                       |                       |
| <i>PE</i>                                                                             | 0.0161                | 0.0139                | 0.0120                | 0.0161                | 0.0139                | 0.00340               |
| <i>Distribution</i>                                                                   | ln (-4.13, 0.0953)    | ln (-4.27, 0.1026)    | ln (-4.43, 0.1754)    | ln (-4.13, 0.0953)    | ln (-4.27, 0.1026)    | Unif (0.0027, 0.0041) |
| <b>NUMBER OF SEXUAL PARTNERS</b>                                                      |                       |                       |                       |                       |                       |                       |
| <b>Monthly number of homosexual partners: White, low-risk MSM</b>                     |                       |                       |                       |                       |                       |                       |
| <i>PE</i>                                                                             | 0.174                 | 0.174                 | 0.174                 | 0.174                 | 0.174                 | 0.174                 |
| <i>Distribution</i>                                                                   | Gamma (133, 0.00131)  |
| <b>Monthly number of homosexual partners: Black low-risk MSM</b>                      |                       |                       |                       |                       |                       |                       |
| <i>PE</i>                                                                             | 0.213                 | 0.213                 | 0.213                 | 0.213                 | 0.213                 | 0.213                 |
| <i>Distribution</i>                                                                   | Gamma (26.5, 0.00806) |
| <b>Monthly number of homosexual partners: Hispanic low-risk MSM</b>                   |                       |                       |                       |                       |                       |                       |
| <i>PE</i>                                                                             | 0.158                 | 0.158                 | 0.158                 | 0.158                 | 0.158                 | 0.158                 |
| <i>Distribution</i>                                                                   | Gamma (39.2, 0.00404) |
| <b>Monthly number of homosexual partners: White, high-risk MSM</b>                    |                       |                       |                       |                       |                       |                       |
| <i>PE</i>                                                                             | 0.802                 | 0.904                 | 0.857                 | 1.30                  | 0.907                 | 0.669                 |
| <i>Distribution</i>                                                                   | Pert (3.23, 4.52)     | Pert (2.55, 4.67)     | Pert (3.35, 4.47)     | Pert (3.32, 4.48)     | Pert (3.23, 4.52)     | Pert (3.14, 4.55)     |
| <b>Monthly number of homosexual partners: Black, high-risk MSM</b>                    |                       |                       |                       |                       |                       |                       |
| <i>PE</i>                                                                             | 0.457                 | 0.665                 | 0.633                 | 1.06                  | 0.603                 | 0.558                 |
| <i>Distribution</i>                                                                   | Pert (1.51, 4.37)     | Pert (3.48, 4.40)     | Pert (2.52, 4.67)     | Pert (3.27, 4.50)     | Pert (2.38, 4.67)     | Pert (1.91, 4.57)     |
| <b>Monthly number of homosexual partners: Hispanic, high-risk MSM</b>                 |                       |                       |                       |                       |                       |                       |
| <i>PE</i>                                                                             | 0.72                  | 0.932                 | 0.725                 | 1.04                  | 0.817                 | 0.757                 |
| <i>Distribution</i>                                                                   | Pert (3.06, 4.58)     | Pert (3.11, 4.57)     | Pert (3.50, 4.38)     | Pert (3.19, 4.54)     | Pert (3.51, 4.38)     | Pert (2.98, 4.61)     |
| <b>Monthly number of heterosexual partners: Male, White, low-risk MSM and MWID</b>    |                       |                       |                       |                       |                       |                       |
| <i>PE</i>                                                                             | 0.0219                | 0.0219                | 0.0219                | 0.0219                | 0.0219                | 0.0219                |
| <i>Distribution</i>                                                                   | Gamma (31, 0.00071)   |
| <b>Monthly number of heterosexual partners: Male, White, low-risk HET</b>             |                       |                       |                       |                       |                       |                       |
| <i>PE</i>                                                                             | 0.0883                | 0.0883                | 0.0800                | 0.0883                | 0.0883                | 0.0800                |
| <i>Distribution</i>                                                                   | Gamma (1248, 0.00007) | Gamma (1248, 0.00007) | Gamma (490, 0.00016)  | Gamma (1248, 0.00007) | Gamma (1248, 0.00007) | Gamma (490, 0.00016)  |
| <b>Monthly number of heterosexual partners: Male, Black, low-risk MSM and MWID</b>    |                       |                       |                       |                       |                       |                       |
| <i>PE</i>                                                                             | 0.0220                | 0.0220                | 0.0220                | 0.0220                | 0.0220                | 0.0220                |
| <i>Distribution</i>                                                                   | Gamma (13, 0.00176)   |
| <b>Monthly number of heterosexual partners: Male, Black, low-risk HET</b>             |                       |                       |                       |                       |                       |                       |
| <i>PE</i>                                                                             | 0.110                 | 0.110                 | 0.105                 | 0.110                 | 0.108                 | 0.105                 |
| <i>Distribution</i>                                                                   | Gamma (697, 0.00016)  | Gamma (697, 0.00016)  | Gamma (68, 0.00155)   | Gamma (697, 0.00016)  | Gamma (152, 0.00071)  | Gamma (68, 0.00155)   |
| <b>Monthly number of heterosexual partners: Male, Hispanic, low-risk MSM and MWID</b> |                       |                       |                       |                       |                       |                       |
| <i>PE</i>                                                                             | 0.0181                | 0.0181                | 0.0181                | 0.0181                | 0.0181                | 0.0181                |
| <i>Distribution</i>                                                                   | Gamma (6, 0.00282)    |
| <b>Monthly number of heterosexual partners: Male, Hispanic, low-risk HET</b>          |                       |                       |                       |                       |                       |                       |
| <i>PE</i>                                                                             | 0.0842                | 0.0842                | 0.0867                | 0.0842                | 0.0908                | 0.0867                |
| <i>Distribution</i>                                                                   | Gamma (638, 0.00013)  | Gamma (638, 0.00013)  | Gamma (513, 0.00017)  | Gamma (638, 0.00013)  | Gamma (317, 0.00029)  | Gamma (513, 0.00017)  |
| <b>Monthly number of heterosexual partners: Female, White, low-risk HET</b>           |                       |                       |                       |                       |                       |                       |
| <i>PE</i>                                                                             | 0.0825                | 0.0825                | 0.0825                | 0.0825                | 0.0925                | 0.0825                |



|                                                                |                     |                     |                     |                     |                     |                     |
|----------------------------------------------------------------|---------------------|---------------------|---------------------|---------------------|---------------------|---------------------|
| <i>Distribution</i>                                            | Pert (2.754, 4.654) |
| Transmission probability (CD4<200): Female to Male             |                     |                     |                     |                     |                     |                     |
| <i>PE</i>                                                      | 0.0500              | 0.0500              | 0.0500              | 0.0500              | 0.0500              | 0.0500              |
| <i>Distribution</i>                                            | Pert (2.656, 4.666) |
| Transmission probability (CD4>500): Male to Female             |                     |                     |                     |                     |                     |                     |
| <i>PE</i>                                                      | 0.0300              | 0.0300              | 0.0300              | 0.0300              | 0.0300              | 0.0300              |
| <i>Distribution</i>                                            | Pert (1.968, 4.592) |
| Transmission probability (CD4: 200-499): Male to Female        |                     |                     |                     |                     |                     |                     |
| <i>PE</i>                                                      | 0.0500              | 0.0500              | 0.0500              | 0.0500              | 0.0500              | 0.0500              |
| <i>Distribution</i>                                            | Pert (4.443, 3.397) |
| Transmission probability (CD4<200): Male to Female             |                     |                     |                     |                     |                     |                     |
| <i>PE</i>                                                      | 0.1000              | 0.1000              | 0.1000              | 0.1000              | 0.1000              | 0.1000              |
| <i>Distribution</i>                                            | Pert (4.27, 3.681)  |
| <b>TRANSMISSION PROBABILITY PER HOMOSEXUAL PARTNERSHIP</b>     |                     |                     |                     |                     |                     |                     |
| Transmission probability (CD4>500)                             |                     |                     |                     |                     |                     |                     |
| <i>PE</i>                                                      | 0.045               | 0.045               | 0.045               | 0.045               | 0.045               | 0.045               |
| <i>Distribution</i>                                            | Pert (2.456, 4.673) |
| Transmission probability (CD4: 200-499)                        |                     |                     |                     |                     |                     |                     |
| <i>PE</i>                                                      | 0.065               | 0.065               | 0.065               | 0.065               | 0.065               | 0.065               |
| <i>Distribution</i>                                            | Pert (4.168, 3.814) |
| Transmission probability (CD4<200)                             |                     |                     |                     |                     |                     |                     |
| <i>PE</i>                                                      | 0.125               | 0.125               | 0.125               | 0.125               | 0.125               | 0.125               |
| <i>Distribution</i>                                            | Pert (4, 4)         |
| <b>TRANSMISSION PROBABILITY PER SHARED INJECTION</b>           |                     |                     |                     |                     |                     |                     |
| Transmission probability (CD4>500)                             |                     |                     |                     |                     |                     |                     |
| <i>PE</i>                                                      | 0.0030              | 0.0030              | 0.0030              | 0.0030              | 0.0030              | 0.0030              |
| <i>Distribution</i>                                            | Pert (2.005, 4.604) |
| Transmission probability (CD4: 200-499)                        |                     |                     |                     |                     |                     |                     |
| <i>PE</i>                                                      | 0.0040              | 0.0040              | 0.0040              | 0.0040              | 0.0040              | 0.0040              |
| <i>Distribution</i>                                            | Pert (2.938, 4.617) |
| Transmission probability (CD4<200)                             |                     |                     |                     |                     |                     |                     |
| <i>PE</i>                                                      | 0.0060              | 0.0060              | 0.0060              | 0.0060              | 0.0060              | 0.0060              |
| <i>Distribution</i>                                            | Pert (1.4, 4.283)   |
| <b>HIV TESTING</b>                                             |                     |                     |                     |                     |                     |                     |
| Monthly rate of symptom-based case finding (CD4: 200-499)      |                     |                     |                     |                     |                     |                     |
| <i>PE</i>                                                      | 0.00874             | 0.00874             | 0.00874             | 0.00874             | 0.00874             | 0.00874             |
| <i>Distribution</i>                                            | Pert (3.86, 4.13)   |
| Monthly rate of symptom-based case finding (CD4<200)           |                     |                     |                     |                     |                     |                     |
| <i>PE</i>                                                      | 0.0184              | 0.0184              | 0.0184              | 0.0184              | 0.0184              | 0.0184              |
| <i>Distribution</i>                                            | Pert (3.84, 4.15)   |
| Monthly rate of HIV testing/screening: Male White PWID         |                     |                     |                     |                     |                     |                     |
| <i>PE</i>                                                      | 0.0363              | 0.0984              | 0.0426              | 0.0544              | 0.0764              | 0.0595              |
| <i>Distribution</i>                                            | Beta (35.7, 65.4)   | Beta (45, 20)       | Beta (99.1, 148.6)  | Beta (109, 118)     | Beta (154, 103)     | Beta (194, 187)     |
| Monthly rate of HIV testing/screening: Male White low-risk MSM |                     |                     |                     |                     |                     |                     |
| <i>PE</i>                                                      | 0.0112              | 0.0066              | 0.0066              | 0.0061              | 0.0313              | 0.0058              |

|                                                                    |                   |                    |                      |                   |                   |                   |
|--------------------------------------------------------------------|-------------------|--------------------|----------------------|-------------------|-------------------|-------------------|
| <i>Distribution</i>                                                | Beta (18.2, 127)  | Beta (13.1, 158.7) | Beta (133.7, 1618.2) | Beta (68.3, 903)  | Beta (102, 225)   | Beta (93, 1292)   |
| Monthly rate of HIV testing/screening: Male White high-risk MSM    |                   |                    |                      |                   |                   |                   |
| <i>PE</i>                                                          | 0.0974            | 0.0955             | 0.1108               | 0.0787            | 0.1304            | 0.0860            |
| <i>Distribution</i>                                                | Beta (59.8, 26.9) | Beta (52.3, 24.4)  | Beta (131, 47.2)     | Beta (119, 75.6)  | Beta (129, 34.2)  | Beta (103, 57.1)  |
| Monthly rate of HIV testing/screening: Male White MWID             |                   |                    |                      |                   |                   |                   |
| <i>PE</i>                                                          | 0.0363            | 0.0984             | 0.0426               | 0.0544            | 0.0764            | 0.0595            |
| <i>Distribution</i>                                                | Beta (35.7, 65.4) | Beta (45, 20)      | Beta (99.1, 149)     | Beta (108.7, 118) | Beta (154, 103)   | Beta (194, 187)   |
| Monthly rate of HIV testing/screening: Male White low-risk HET     |                   |                    |                      |                   |                   |                   |
| <i>PE</i>                                                          | 0.0112            | 0.0066             | 0.0066               | 0.0061            | 0.0313            | 0.0058            |
| <i>Distribution</i>                                                | Beta (18.2, 127)  | Beta (13.1, 158.7) | Beta (134, 1618)     | Beta (68.3, 903)  | Beta (102, 225)   | Beta (93, 1292)   |
| Monthly rate of HIV testing/screening: Male White high-risk HET    |                   |                    |                      |                   |                   |                   |
| <i>PE</i>                                                          | 0.116             | 0.0457             | 0.0143               | 0.2496            | 0.0916            | 0.0160            |
| <i>Distribution</i>                                                | Beta (53.7, 17.9) | Beta (13.2, 18)    | Beta (19.3, 103.1)   | Beta (348, 18.3)  | Beta (125, 62.4)  | Beta (24.4, 115)  |
| Monthly rate of HIV testing/screening: Male Black PWID             |                   |                    |                      |                   |                   |                   |
| <i>PE</i>                                                          | 0.0642            | 0.0984             | 0.0647               | 0.0892            | 0.0946            | 0.0440            |
| <i>Distribution</i>                                                | Beta (17.8, 15.3) | Beta (12.5, 5.5)   | Beta (3.9, 3.4)      | Beta (13.6, 7.1)  | Beta (12.6, 5.99) | Beta (1.8, 2.7)   |
| Monthly rate of HIV testing/screening: Male Black low-risk MSM     |                   |                    |                      |                   |                   |                   |
| <i>PE</i>                                                          | 0.0236            | 0.0206             | 0.0170               | 0.0101            | 0.0336            | 0.0218            |
| <i>Distribution</i>                                                | Beta (19.1, 58.4) | Beta (27.8, 99)    | Beta (22.1, 97.7)    | Beta (17.7, 137)  | Beta (113, 228)   | Beta (12.2, 40.8) |
| Monthly rate of HIV testing/screening: Male Black high-risk MSM    |                   |                    |                      |                   |                   |                   |
| <i>PE</i>                                                          | 0.113             | 0.0955             | 0.1651               | 0.0971            | 0.101             | 0.0578            |
| <i>Distribution</i>                                                | Beta (17.1, 5.9)  | Beta (14.5, 6.8)   | Beta (6.1, 0.97)     | Beta (12.1, 5.5)  | Beta (11.5, 4.9)  | Beta (1.6, 1.6)   |
| Monthly rate of HIV testing/screening: Male Black MWID             |                   |                    |                      |                   |                   |                   |
| <i>PE</i>                                                          | 0.0642            | 0.0984             | 0.0647               | 0.0892            | 0.0946            | 0.0440            |
| <i>Distribution</i>                                                | Beta (17.8, 15.3) | Beta (12.5, 5.5)   | Beta (3.9, 3.4)      | Beta (13.6, 7.1)  | Beta (12.6, 5.99) | Beta (1.8, 2.7)   |
| Monthly rate of HIV testing/screening: Male Black low-risk HET     |                   |                    |                      |                   |                   |                   |
| <i>PE</i>                                                          | 0.0236            | 0.0206             | 0.0170               | 0.0101            | 0.0336            | 0.0218            |
| <i>Distribution</i>                                                | Beta (19.1, 58.4) | Beta (27.8, 99)    | Beta (22.1, 97.7)    | Beta (17.7, 137)  | Beta (113, 228)   | Beta (12.2, 40.8) |
| Monthly rate of HIV testing/screening: Male Black high-risk HET    |                   |                    |                      |                   |                   |                   |
| <i>PE</i>                                                          | 0.0473            | 0.0457             | 0.0338               | 0.0470            | 0.0561            | 0.0207            |
| <i>Distribution</i>                                                | Beta (12.2, 16)   | Beta (3.5, 4.8)    | Beta (2.2, 4.4)      | Beta (9.8, 12.9)  | Beta (8.2, 8.5)   | Beta (0.84, 2.98) |
| Monthly rate of HIV testing/screening: Male Hispanic PWID          |                   |                    |                      |                   |                   |                   |
| <i>PE</i>                                                          | 0.0578            | 0.0984             | 0.0595               | 0.0719            | 0.116             | 0.0501            |
| <i>Distribution</i>                                                | Beta (1.6, 1.6)   | Beta (4, 1.8)      | Beta (58.1, 55.8)    | Beta (5.3, 3.9)   | Beta (9.1, 3.03)  | Beta (22.1, 26.8) |
| Monthly rate of HIV testing/screening: Male Hispanic low-risk MSM  |                   |                    |                      |                   |                   |                   |
| <i>PE</i>                                                          | 0.0441            | 0.0150             | 0.0075               | 0.0157            | 0.0366            | 0.0039            |
| <i>Distribution</i>                                                | Beta (5.3, 7.6)   | Beta (4, 20)       | Beta (73.4, 785)     | Beta (16.5, 79.6) | Beta (123, 223)   | Beta (4.98, 104)  |
| Monthly rate of HIV testing/screening: Male Hispanic high-risk MSM |                   |                    |                      |                   |                   |                   |
| <i>PE</i>                                                          | 0.0512            | 0.0955             | 0.106                | 0.0799            | 0.132             | 0.0897            |
| <i>Distribution</i>                                                | Beta (1.4, 1.7)   | Beta (4.2, 2)      | Beta (58.7, 23)      | Beta (4.9, 3)     | Beta (9.9, 2.5)   | Beta (13, 6.7)    |
| Monthly rate of HIV testing/screening: Male Hispanic MWID          |                   |                    |                      |                   |                   |                   |
| <i>PE</i>                                                          | 0.0578            | 0.0984             | 0.0595               | 0.0719            | 0.116             | 0.0501            |
| <i>Distribution</i>                                                | Beta (1.6, 1.6)   | Beta (4, 1.8)      | Beta (58.1, 55.8)    | Beta (5.3, 3.9)   | Beta (9.1, 3.03)  | Beta (22.1, 26.8) |
| Monthly rate of HIV testing/screening: Male Hispanic low-risk HET  |                   |                    |                      |                   |                   |                   |
| <i>PE</i>                                                          | 0.0441            | 0.0150             | 0.0075               | 0.0157            | 0.0366            | 0.0039            |



|                                                                      |                   |                   |                      |                   |                   |                    |
|----------------------------------------------------------------------|-------------------|-------------------|----------------------|-------------------|-------------------|--------------------|
| <i>Distribution</i>                                                  | Beta (5.3, 7.6)   | Beta (4, 20)      | Beta (73.4, 785)     | Beta (16.5, 79.6) | Beta (123, 223)   | Beta (4.98, 104)   |
| Monthly rate of HIV testing/screening: Male Hispanic high-risk HET   |                   |                   |                      |                   |                   |                    |
| <i>PE</i>                                                            | 0.0186            | 0.0457            | 0.0144               | 0.0338            | 0.0547            | 0.0219             |
| <i>Distribution</i>                                                  | Beta (0.8, 3)     | Beta (1.3, 1.8)   | Beta (8.5, 45.4)     | Beta (2.8, 5.6)   | Beta (5.9, 6.4)   | Beta (5.03, 16.8)  |
| Monthly rate of HIV testing/screening: Female White PWID             |                   |                   |                      |                   |                   |                    |
| <i>PE</i>                                                            | 0.0530            | 0.0911            | 0.0381               | 0.104             | 0.142             | 0.0485             |
| <i>Distribution</i>                                                  | Beta (191, 214)   | Beta (60, 30)     | Beta (122, 210)      | Beta (241, 96)    | Beta (184, 41)    | Beta (263, 333)    |
| Monthly rate of HIV testing/screening: Female White low-risk HET     |                   |                   |                      |                   |                   |                    |
| <i>PE</i>                                                            | 0.0060            | 0.0071            | 0.0055               | 0.0052            | 0.0257            | 0.0050             |
| <i>Distribution</i>                                                  | Beta (21.7, 289)  | Beta (42.6, 479)  | Beta (130, 1916)     | Beta (91.7, 1434) | Beta (133.9, 370) | Beta (112.3, 1814) |
| Monthly rate of HIV testing/screening: Female White high-risk HET    |                   |                   |                      |                   |                   |                    |
| <i>PE</i>                                                            | 0.0426            | 0.0627            | 0.0969               | 0.0916            | 0.0916            | 0.0459             |
| <i>Distribution</i>                                                  | Beta (135, 203)   | Beta (58, 52)     | Beta (189, 86)       | Beta (247, 123)   | Beta (176, 88)    | Beta (160, 217)    |
| Monthly rate of HIV testing/screening: Female Black PWID             |                   |                   |                      |                   |                   |                    |
| <i>PE</i>                                                            | 0.0659            | 0.0911            | 0.0880               | 0.1083            | 0.116             | 0.0657             |
| <i>Distribution</i>                                                  | Beta (53.2, 44.1) | Beta (8.5, 4.3)   | Beta (6, 3.2)        | Beta (8.1, 3.03)  | Beta (20.8, 6.9)  | Beta (2.96, 2.5)   |
| Monthly rate of HIV testing/screening: Female Black low-risk HET     |                   |                   |                      |                   |                   |                    |
| <i>PE</i>                                                            | 0.0191            | 0.0278            | 0.0185               | 0.0223            | 0.0356            | 0.0135             |
| <i>Distribution</i>                                                  | Beta (40, 156)    | Beta (61.4, 155)  | Beta (34.2, 137)     | Beta (43.1, 140)  | Beta (190, 358)   | Beta (6.7, 38)     |
| Monthly rate of HIV testing/screening: Female Black high-risk HET    |                   |                   |                      |                   |                   |                    |
| <i>PE</i>                                                            | 0.0446            | 0.0627            | 0.0402               | 0.0486            | 0.0508            | 0.0343             |
| <i>Distribution</i>                                                  | Beta (34.2, 48.2) | Beta (8.2, 7.3)   | Beta (3.2, 5.2)      | Beta (6.4, 8.1)   | Beta (13.2, 15.8) | Beta (1.5, 2.9)    |
| Monthly rate of HIV testing/screening: Female Hispanic PWID          |                   |                   |                      |                   |                   |                    |
| <i>PE</i>                                                            | 0.0034            | 0.0911            | 0.0609               | 0.0706            | 0.123             | 0.0372             |
| <i>Distribution</i>                                                  | Beta (8, 192.7)   | Beta (2.8, 1.4)   | Beta (60.1, 55.8)    | Beta (23, 17.2)   | Beta (16.4, 4.9)  | Beta (11.6, 20.6)  |
| Monthly rate of HIV testing/screening: Female Hispanic low-risk HET  |                   |                   |                      |                   |                   |                    |
| <i>PE</i>                                                            | 0.0024            | 0.0161            | 0.0112               | 0.0076            | 0.0407            | 0.0091             |
| <i>Distribution</i>                                                  | Beta (1.2, 40)    | Beta (6.5, 30.5)  | Beta (154.5, 1078.8) | Beta (18.6, 194)  | Beta (225, 357)   | Beta (19.4, 168)   |
| Monthly rate of HIV testing/screening: Female Hispanic high-risk HET |                   |                   |                      |                   |                   |                    |
| <i>PE</i>                                                            | 0.0764            | 0.0627            | 0.0251               | 0.0392            | 0.0603            | 0.0338             |
| <i>Distribution</i>                                                  | Beta (86.7, 57.8) | Beta (1.8, 1.6)   | Beta (20.7, 59)      | Beta (14.6, 24.3) | Beta (12.2, 11.5) | Beta (6.5, 12.9)   |
| Annual change in HIV testing rate                                    |                   |                   |                      |                   |                   |                    |
| <i>PE</i>                                                            | 0.05              | 0.05              | 0.05                 | 0.05              | 0.05              | 0.05               |
| <i>Distribution</i>                                                  | Unif (0, 0.1)     | Unif (0, 0.1)     | Unif (0, 0.1)        | Unif (0, 0.1)     | Unif (0, 0.1)     | Unif (0, 0.1)      |
| <b>QUALITY-ADJUSTED LIFE-YEAR WEIGHTS</b>                            |                   |                   |                      |                   |                   |                    |
| QALY weight for infected PLHIV (CD4>500)                             |                   |                   |                      |                   |                   |                    |
| <i>PE</i>                                                            | 0.91              | 0.91              | 0.91                 | 0.91              | 0.91              | 0.91               |
| <i>Distribution</i>                                                  | Pert (4.44, 3.4)  | Pert (4.44, 3.4)  | Pert (4.44, 3.4)     | Pert (4.44, 3.4)  | Pert (4.44, 3.4)  | Pert (4.44, 3.4)   |
| QALY weight for infected PLHIV (CD4: 200-499)                        |                   |                   |                      |                   |                   |                    |
| <i>PE</i>                                                            | 0.79              | 0.79              | 0.79                 | 0.79              | 0.79              | 0.79               |
| <i>Distribution</i>                                                  | Pert (4.17, 1.27) | Pert (4.17, 1.27) | Pert (4.17, 1.27)    | Pert (4.17, 1.27) | Pert (4.17, 1.27) | Pert (4.17, 1.27)  |
| QALY weight for infected PLHIV (CD4<200)                             |                   |                   |                      |                   |                   |                    |
| <i>PE</i>                                                            | 0.72              | 0.72              | 0.72                 | 0.72              | 0.72              | 0.72               |
| <i>Distribution</i>                                                  | Pert (4.59, 1.97) | Pert (4.59, 1.97) | Pert (4.59, 1.97)    | Pert (4.59, 1.97) | Pert (4.59, 1.97) | Pert (4.59, 1.97)  |
| QALY weight for diagnosed PLHIV (CD4>500)                            |                   |                   |                      |                   |                   |                    |

|                                                            |                     |                     |                     |                     |                     |                     |
|------------------------------------------------------------|---------------------|---------------------|---------------------|---------------------|---------------------|---------------------|
| <i>PE</i>                                                  | 0.865               | 0.865               | 0.865               | 0.865               | 0.865               | 0.865               |
| <i>Distribution</i>                                        | Pert (1.61, 4.43)   |
| QALY weight for diagnosed PLHIV (CD4: 200-499)             |                     |                     |                     |                     |                     |                     |
| <i>PE</i>                                                  | 0.72                | 0.72                | 0.72                | 0.72                | 0.72                | 0.72                |
| <i>Distribution</i>                                        | Pert (1.97, 4.59)   |
| QALY weight for diagnosed PLHIV (CD4<200)                  |                     |                     |                     |                     |                     |                     |
| <i>PE</i>                                                  | 0.72                | 0.72                | 0.72                | 0.72                | 0.72                | 0.72                |
| <i>Distribution</i>                                        | Pert (4.59, 1.97)   |
| QALY weight for treated PLHIV (CD4>500)                    |                     |                     |                     |                     |                     |                     |
| <i>PE</i>                                                  | 0.865               | 0.865               | 0.865               | 0.865               | 0.865               | 0.865               |
| <i>Distribution</i>                                        | Pert (1.611, 4.429) |
| QALY weight for treated PLHIV (CD4: 200-499)               |                     |                     |                     |                     |                     |                     |
| <i>PE</i>                                                  | 0.83                | 0.83                | 0.83                | 0.83                | 0.83                | 0.83                |
| <i>Distribution</i>                                        | Pert (1.97, 4.59)   |
| QALY weight for treated PLHIV (CD4<200)                    |                     |                     |                     |                     |                     |                     |
| <i>PE</i>                                                  | 0.82                | 0.82                | 0.82                | 0.82                | 0.82                | 0.82                |
| <i>Distribution</i>                                        | Pert (0.667, 3.33)  |
| QALY weight adjusted for PWID                              |                     |                     |                     |                     |                     |                     |
| <i>PE</i>                                                  | 0.174               | 0.174               | 0.174               | 0.174               | 0.174               | 0.174               |
| <i>Distribution</i>                                        | Pert (4, 4)         |
| QALY weight adjusted for opioid agonist therapy recipients |                     |                     |                     |                     |                     |                     |
| <i>PE</i>                                                  | 0.213               | 0.213               | 0.213               | 0.213               | 0.213               | 0.213               |
| <i>Distribution</i>                                        | Pert (3.7, 4.25)    |
| <b>HEALTH CARE COSTS FOR PLHIV RECEIVING ART</b>           |                     |                     |                     |                     |                     |                     |
| Health care cost (CD4>500): Male PWID                      |                     |                     |                     |                     |                     |                     |
| <i>PE</i>                                                  | 4559                | 4219                | 4604                | 4559                | 4219                | 4604                |
| <i>Distribution</i>                                        | Gamma (6301, 2.17)  | Gamma (6511, 1.94)  | Gamma (5048, 2.74)  | Gamma (6301, 2.17)  | Gamma (6511, 1.94)  | Gamma (5048, 2.74)  |
| Health care cost (CD4>500): Male MSM                       |                     |                     |                     |                     |                     |                     |
| <i>PE</i>                                                  | 3784                | 3503                | 3821                | 3784                | 3503                | 3821                |
| <i>Distribution</i>                                        | Gamma (24395, 0.47) | Gamma (28851, 0.36) | Gamma (15423, 0.74) | Gamma (24395, 0.47) | Gamma (28851, 0.36) | Gamma (15423, 0.74) |
| Health care cost (CD4>500): Male MWID                      |                     |                     |                     |                     |                     |                     |
| <i>PE</i>                                                  | 4173                | 3862                | 4214                | 4173                | 3862                | 4214                |
| <i>Distribution</i>                                        | Gamma (3013, 4.15)  | Gamma (3027, 3.83)  | Gamma (2989, 4.23)  | Gamma (3013, 4.15)  | Gamma (3027, 3.83)  | Gamma (2989, 4.23)  |
| Health care cost (CD4>500): Male HET                       |                     |                     |                     |                     |                     |                     |
| <i>PE</i>                                                  | 3951                | 3657                | 3990                | 3951                | 3657                | 3990                |
| <i>Distribution</i>                                        | Gamma (14940, 0.79) | Gamma (14297, 0.77) | Gamma (9092, 1.32)  | Gamma (14940, 0.79) | Gamma (14297, 0.77) | Gamma (9092, 1.32)  |
| Health care cost (CD4>500): Female PWID                    |                     |                     |                     |                     |                     |                     |
| <i>PE</i>                                                  | 4781                | 4425                | 4828                | 4781                | 4425                | 4828                |
| <i>Distribution</i>                                        | Gamma (3594, 3.99)  | Gamma (3615, 3.67)  | Gamma (3142, 4.61)  | Gamma (3594, 3.99)  | Gamma (3615, 3.67)  | Gamma (3142, 4.61)  |
| Health care cost (CD4>500): Female HET                     |                     |                     |                     |                     |                     |                     |
| <i>PE</i>                                                  | 4090                | 3786                | 4130                | 4090                | 3786                | 4130                |
| <i>Distribution</i>                                        | Gamma (17345, 0.71) | Gamma (16692, 0.68) | Gamma (9559, 1.3)   | Gamma (17345, 0.71) | Gamma (16692, 0.68) | Gamma (9559, 1.3)   |
| Health care cost (CD4: 200-499): Male PWID                 |                     |                     |                     |                     |                     |                     |
| <i>PE</i>                                                  | 4620                | 4277                | 4666                | 4620                | 4277                | 4666                |

|                                              |                     |                     |                     |                     |                     |                     |
|----------------------------------------------|---------------------|---------------------|---------------------|---------------------|---------------------|---------------------|
| <i>Distribution</i>                          | Gamma (6362, 2.18)  | Gamma (6526, 1.97)  | Gamma (5072, 2.76)  | Gamma (6362, 2.18)  | Gamma (6526, 1.97)  | Gamma (5072, 2.76)  |
| Health care cost (CD4: 200-499): Male MSM    |                     |                     |                     |                     |                     |                     |
| <i>PE</i>                                    | 3835                | 3550                | 3873                | 3835                | 3550                | 3873                |
| <i>Distribution</i>                          | Gamma (24477, 0.47) | Gamma (28010, 0.38) | Gamma (15325, 0.76) | Gamma (24477, 0.47) | Gamma (28010, 0.38) | Gamma (15325, 0.76) |
| Health care cost (CD4: 200-499): Male MWID   |                     |                     |                     |                     |                     |                     |
| <i>PE</i>                                    | 4229                | 3914                | 4271                | 4229                | 3914                | 4271                |
| <i>Distribution</i>                          | Gamma (3020, 4.2)   | Gamma (3024, 3.88)  | Gamma (2991, 4.28)  | Gamma (3020, 4.2)   | Gamma (3024, 3.88)  | Gamma (2991, 4.28)  |
| Health care cost (CD4: 200-499): Male HET    |                     |                     |                     |                     |                     |                     |
| <i>PE</i>                                    | 4004                | 3706                | 4044                | 4004                | 3706                | 4044                |
| <i>Distribution</i>                          | Gamma (15199, 0.79) | Gamma (14288, 0.78) | Gamma (9140, 1.33)  | Gamma (15199, 0.79) | Gamma (14288, 0.78) | Gamma (9140, 1.33)  |
| Health care cost (CD4: 200-499): Female PWID |                     |                     |                     |                     |                     |                     |
| <i>PE</i>                                    | 4845                | 4485                | 4893                | 4845                | 4485                | 4893                |
| <i>Distribution</i>                          | Gamma (3595, 4.04)  | Gamma (3602, 3.74)  | Gamma (3137, 4.68)  | Gamma (3595, 4.04)  | Gamma (3602, 3.74)  | Gamma (3137, 4.68)  |
| Health care cost (CD4: 200-499): Female HET  |                     |                     |                     |                     |                     |                     |
| <i>PE</i>                                    | 4145                | 3837                | 4186                | 4145                | 3837                | 4186                |
| <i>Distribution</i>                          | Gamma (17205, 0.72) | Gamma (16243, 0.71) | Gamma (9466, 1.33)  | Gamma (17205, 0.72) | Gamma (16243, 0.71) | Gamma (9466, 1.33)  |
| Health care cost (CD4<200): Male PWID        |                     |                     |                     |                     |                     |                     |
| <i>PE</i>                                    | 4928                | 4561                | 4977                | 4928                | 4561                | 4977                |
| <i>Distribution</i>                          | Gamma (5983, 2.47)  | Gamma (6089, 2.25)  | Gamma (4815, 3.1)   | Gamma (5983, 2.47)  | Gamma (6089, 2.25)  | Gamma (4815, 3.1)   |
| Health care cost (CD4<200): Male MSM         |                     |                     |                     |                     |                     |                     |
| <i>PE</i>                                    | 4091                | 3786                | 4131                | 4091                | 3786                | 4131                |
| <i>Distribution</i>                          | Gamma (18905, 0.65) | Gamma (20517, 0.55) | Gamma (12845, 0.96) | Gamma (18905, 0.65) | Gamma (20517, 0.55) | Gamma (12845, 0.96) |
| Health care cost (CD4<200): Male MWID        |                     |                     |                     |                     |                     |                     |
| <i>PE</i>                                    | 4511                | 4175                | 4555                | 4511                | 4175                | 4555                |
| <i>Distribution</i>                          | Gamma (2921, 4.63)  | Gamma (2916, 4.3)   | Gamma (2889, 4.73)  | Gamma (2921, 4.63)  | Gamma (2916, 4.3)   | Gamma (2889, 4.73)  |
| Health care cost (CD4<200): Male HET         |                     |                     |                     |                     |                     |                     |
| <i>PE</i>                                    | 4271                | 3953                | 4313                | 4271                | 3953                | 4313                |
| <i>Distribution</i>                          | Gamma (13136, 0.98) | Gamma (12299, 0.96) | Gamma (8314, 1.56)  | Gamma (13136, 0.98) | Gamma (12299, 0.96) | Gamma (8314, 1.56)  |
| Health care cost (CD4<200): Female PWID      |                     |                     |                     |                     |                     |                     |
| <i>PE</i>                                    | 5168                | 4783                | 5219                | 5168                | 4783                | 5219                |
| <i>Distribution</i>                          | Gamma (3455, 4.49)  | Gamma (3449, 4.16)  | Gamma (3025, 5.18)  | Gamma (3455, 4.49)  | Gamma (3449, 4.16)  | Gamma (3025, 5.18)  |
| Health care cost (CD4<200): Female HET       |                     |                     |                     |                     |                     |                     |
| <i>PE</i>                                    | 4421                | 4092                | 4465                | 4421                | 4092                | 4465                |
| <i>Distribution</i>                          | Gamma (14313, 0.93) | Gamma (13461, 0.91) | Gamma (8481, 1.58)  | Gamma (14313, 0.93) | Gamma (13461, 0.91) | Gamma (8481, 1.58)  |

PE: point estimate; PLHIV: people living with HIV; PWID: people who inject drugs; MSM: men who have sex with men; MWID: men who are both MSM and PWID; HET: heterosexual; ln: lognormal; Unif: uniform; QALY: quality-adjusted life year.
